# Supplementary material
Source: PubMed Central journal article supplement (PMC9194633)
Supplement: djab171_supplementary_data.pdf [file djab171_supplementary_data.pdf]

# SUPPLEMENTARY MATERIALS

## Supplementary Methods

### Search Terminology & PICOS Question

| Pharmalogical Agent | Alternate 1: | Alternate 2:                   |
|---------------------|--------------|--------------------------------|
| nivolumab           | Opdivo       |                                |
| pembrolizumab       | Keytruda     |                                |
| pidilizumab         |              |                                |
| BMS 936559          | anti-PD-L1   | Anti-PD-L1 Antibody BMS-936559 |
| durvalumab          | Imfinzi      |                                |
| Atezolizumab        | Tecentriq    |                                |
| Avelumab            | Bavencio     |                                |
| Ipilimumab          | Yervoy       |                                |
| Tremelimumab        | ticilimumab  |                                |

PICOS (P = participants/population, I = Interventions/exposures, C = comparators/controls, and O = outcomes; primary and secondary outcomes, S= study type)

P = Adult cancer patients

I = Immune checkpoint inhibitors administered (alemtuzumab, nivolumab, pembrolizumab, pidilizumab, BMS 936559, durvalumab, Atezolizumab, Avelumab, Ipilimumab, Tremelimumab, rituximab, ofatumumab)

C = N/A

O = Primary outcome: PRO (patient-reported outcome) Secondary outcome: Quality of Life (wellness, wellbeing, QoL, etc.)

S = Original data (not a review, meta-analysis, secondary data analysis, case report, case series, commentary, retrospective, registry studies, etc...). Clinical Trials, Randomized Control Trials, etc. Expanded access trials are acceptable.

### Search Strings

| PubMed Search        |                                                                                                                                                                                                                                                       |
|----------------------|-------------------------------------------------------------------------------------------------------------------------------------------------------------------------------------------------------------------------------------------------------|
| Search #             | PubMed Keywords & Translations                                                                                                                                                                                                                        |
| 1.                   | "nivolumab"[Supplementary Concept] OR "nivolumab"[All Fields] OR "opdivo"[All Fields]                                                                                                                                                                 |
| 2.                   | pembrolizumab[Supplementary Concept] OR "pembrolizumab"[All Fields]                                                                                                                                                                                   |
| 3.                   | pidilizumab[Supplementary Concept] OR "pidilizumab"[All Fields]                                                                                                                                                                                       |
| 4.                   | a[All Fields] OR anti-PD-L1[All Fields] OR (Anti-PD-L1[All Fields] AND ("immunoglobulins"[MeSH Terms] OR "immunoglobulins"[All Fields] OR "antibody"[All Fields] OR "antibodies"[MeSH Terms] OR "antibodies"[All Fields]) AND BMS-936559[All Fields]) |
| 5.                   | durvalumab[Supplementary Concept] OR "durvalumab"[All Fields]                                                                                                                                                                                         |
| 6.                   | atezolizumab[Supplementary Concept] OR "atezolizumab"[All Fields] OR "tecentriq"[All Fields]                                                                                                                                                          |
| 7.                   | avelumab[Supplementary Concept] OR "avelumab"[All Fields] OR Bavencio[All Fields]                                                                                                                                                                     |
| 8.                   | ipilimumab[Supplementary Concept] OR "ipilimumab"[All Fields] OR "yervoy"[All Fields]                                                                                                                                                                 |
| 9.                   | tremelimumab[Supplementary Concept] OR "tremelimumab"[All Fields] OR "ticilimumab"[All Fields] OR "cp 675,206"[All Fields]                                                                                                                            |
| <b>Final Action:</b> | Export results for 1, 2, 3, 4, 5, 6, 7, 8, & 9 to EndNote & deduplicate                                                                                                                                                                               |

### Web of Science Search

| Search # | # of Results | Web of Science Search String                                    |
|----------|--------------|-----------------------------------------------------------------|
| 1        | 2,765        | TS=(nivolumab OR opdivo)                                        |
| 2        | 1,673        | TS=(pembrolizumab OR keytruda)                                  |
| 3        | 33           | TS=(pidilizumab)                                                |
| 4        | 846          | TS=(BMS 936559 OR anti-PD-L1 OR Anti-PD-L1 Antibody BMS-936559) |
| 5        | 143          | TS=(durvalumab OR imfinzi)                                      |
| 6        | 275          | TS=(Atezolizumab OR Tecentriq)                                  |
| 7        | 130          | TS=(Avelumab OR Bavencio)                                       |
| 8        | 47           | TS=(Ipiliumumab OR Yervoy)                                      |
| 9        | 269          | TS=(Tremelimumab OR Ticilimumab)                                |
| 10       | 4,844        | #9 OR #8 OR #7 OR #6 OR #5 OR #4 OR #3 OR #2 OR #1              |

**Final Action:** Export results to EndNote & deduplicate

### Embase Search

| Search # | Embase Search String                                                                                                                                                                                                                     |
|----------|------------------------------------------------------------------------------------------------------------------------------------------------------------------------------------------------------------------------------------------|
| #1       | 'nivolumab'/exp OR 'pembrolizumab'/exp OR 'pidilizumab'/exp OR 'bms 936559'/exp OR 'durvalumab'/exp OR 'atezolizumab'/exp OR 'avelumab'/exp OR 'ipilimumab'/exp OR 'ticilimumab'/exp OR 'anti-pd-l1' OR 'anti-pd-l1 antibody bms-936559' |

**Final Action:** Export results to EndNote & deduplicate

### PRISMA Checklist

| Section/topic             | # | Checklist item                                                                                                                                                                                                                                                                                              | Reported on page # |
|---------------------------|---|-------------------------------------------------------------------------------------------------------------------------------------------------------------------------------------------------------------------------------------------------------------------------------------------------------------|--------------------|
| <b>TITLE</b>              |   |                                                                                                                                                                                                                                                                                                             |                    |
| Title                     | 1 | Identify the report as a systematic review, meta-analysis, or both.                                                                                                                                                                                                                                         | 1                  |
| <b>ABSTRACT</b>           |   |                                                                                                                                                                                                                                                                                                             |                    |
| Structured summary        | 2 | Provide a structured summary including, as applicable: background; objectives; data sources; study eligibility criteria, participants, and interventions; study appraisal and synthesis methods; results; limitations; conclusions and implications of key findings; systematic review registration number. | 2                  |
| <b>INTRODUCTION</b>       |   |                                                                                                                                                                                                                                                                                                             |                    |
| Rationale                 | 3 | Describe the rationale for the review in the context of what is already known.                                                                                                                                                                                                                              | 3                  |
| Objectives                | 4 | Provide an explicit statement of questions being addressed with reference to participants, interventions, comparisons, outcomes, and study design (PICOS).                                                                                                                                                  | 3, Appendix A      |
| <b>METHODS</b>            |   |                                                                                                                                                                                                                                                                                                             |                    |
| Protocol and registration | 5 | Indicate if a review protocol exists, if and where it can be accessed (e.g., Web address), and, if available, provide registration information including registration number.                                                                                                                               | 4                  |
| Eligibility criteria      | 6 | Specify study characteristics (e.g., PICOS, length of follow-up) and report characteristics (e.g., years considered, language, publication status) used as criteria for eligibility, giving rationale.                                                                                                      | 4, Appendix A      |

|                                    |    |                                                                                                                                                                                                                        |               |
|------------------------------------|----|------------------------------------------------------------------------------------------------------------------------------------------------------------------------------------------------------------------------|---------------|
| Information sources                | 7  | Describe all information sources (e.g., databases with dates of coverage, contact with study authors to identify additional studies) in the search and date last searched.                                             | 4, Appendix B |
| Search                             | 8  | Present full electronic search strategy for at least one database, including any limits used, such that it could be repeated.                                                                                          | Appendix B    |
| Study selection                    | 9  | State the process for selecting studies (i.e., screening, eligibility, included in systematic review, and, if applicable, included in the meta-analysis).                                                              | 5             |
| Data collection process            | 10 | Describe method of data extraction from reports (e.g., piloted forms, independently, in duplicate) and any processes for obtaining and confirming data from investigators.                                             | 4             |
| Data items                         | 11 | List and define all variables for which data were sought (e.g., PICOS, funding sources) and any assumptions and simplifications made.                                                                                  | 4, Appendix A |
| Risk of bias in individual studies | 12 | Describe methods used for assessing risk of bias of individual studies (including specification of whether this was done at the study or outcome level), and how this information is to be used in any data synthesis. | 5             |
| Summary measures                   | 13 | State the principal summary measures (e.g., risk ratio, difference in means).                                                                                                                                          | 5             |
| Synthesis of results               | 14 | Describe the methods of handling data and combining results of studies, if done, including measures of consistency (e.g., $I^2$ ) for each meta-analysis.                                                              | 5             |

| Section/topic                 | #  | Checklist item                                                                                                                                                                                           | Reported on page # |
|-------------------------------|----|----------------------------------------------------------------------------------------------------------------------------------------------------------------------------------------------------------|--------------------|
| Risk of bias across studies   | 15 | Specify any assessment of risk of bias that may affect the cumulative evidence (e.g., publication bias, selective reporting within studies).                                                             | 5                  |
| Additional analyses           | 16 | Describe methods of additional analyses (e.g., sensitivity or subgroup analyses, meta-regression), if done, indicating which were pre-specified.                                                         | 5, 6               |
| <b>RESULTS</b>                |    |                                                                                                                                                                                                          |                    |
| Study selection               | 17 | Give numbers of studies screened, assessed for eligibility, and included in the review, with reasons for exclusions at each stage, ideally with a flow diagram.                                          | 6, Figure 1        |
| Study characteristics         | 18 | For each study, present characteristics for which data were extracted (e.g., study size, PICOS, follow-up period) and provide the citations.                                                             | Table 1            |
| Risk of bias within studies   | 19 | Present data on risk of bias of each study and, if available, any outcome level assessment (see item 12).                                                                                                | Appendix D         |
| Results of individual studies | 20 | For all outcomes considered (benefits or harms), present, for each study: (a) simple summary data for each intervention group (b) effect estimates and confidence intervals, ideally with a forest plot. | Figure 2, Figure 3 |
| Synthesis of results          | 21 | Present results of each meta-analysis done, including confidence intervals and measures of consistency.                                                                                                  | 6, 7               |
| Risk of bias across studies   | 22 | Present results of any assessment of risk of bias across studies (see Item 15).                                                                                                                          | 6, 7               |
| Additional analysis           | 23 | Give results of additional analyses, if done (e.g., sensitivity or subgroup analyses, meta-regression [see Item 16]).                                                                                    | 6, 7               |
| <b>DISCUSSION</b>             |    |                                                                                                                                                                                                          |                    |

|                     |    |                                                                                                                                                                                      |    |
|---------------------|----|--------------------------------------------------------------------------------------------------------------------------------------------------------------------------------------|----|
| Summary of evidence | 24 | Summarize the main findings including the strength of evidence for each main outcome; consider their relevance to key groups (e.g., healthcare providers, users, and policy makers). | 8  |
| Limitations         | 25 | Discuss limitations at study and outcome level (e.g., risk of bias), and at review-level (e.g., incomplete retrieval of identified research, reporting bias).                        | 10 |
| Conclusions         | 26 | Provide a general interpretation of the results in the context of other evidence, and implications for future research.                                                              | 10 |
| <b>FUNDING</b>      |    |                                                                                                                                                                                      |    |
| Funding             | 27 | Describe sources of funding for the systematic review and other support (e.g., supply of data); role of funders for the systematic review.                                           | 1  |

Adapted From: Moher D, Liberati A, Tetzlaff J, Altman DG, The PRISMA Group (2009). Preferred Reporting Items for Systematic Reviews and Meta-Analyses: The PRISMA Statement. PLoS Med 6(7): e1000097. doi:10.1371/journal.pmed1000097

### Potential Moderators Examined

Potential moderators that were examined included: ICI regimen, disease site, follow-up duration, comparator group, mean sample age, Percent female, risk of bias, and quality of patient-reported outcomes reporting.

## Supplementary Tables

**Supplementary Table 1: Targeted Abstract Searches<sup>a,b</sup>**

| Organization/Conference Name                                                                                                          | URL                                                                                                                                                                                         |
|---------------------------------------------------------------------------------------------------------------------------------------|---------------------------------------------------------------------------------------------------------------------------------------------------------------------------------------------|
| American Association of Cancer Research (AACR)                                                                                        | <a href="http://aacrjournals.org/site/Meetings/meeting_abs.xhtml">http://aacrjournals.org/site/Meetings/meeting_abs.xhtml</a>                                                               |
| American Association for Cancer Research (AACR) and International Association for the Study of Lung Cancer (IASLC) Joint Conference   | <a href="http://aacrjournals.org/site/Meetings/meeting_abs.xhtml">http://aacrjournals.org/site/Meetings/meeting_abs.xhtml</a>                                                               |
| Proceedings of the Fourth AACR-IASLC International Joint Conference on Lung Cancer Translational Science from the Bench to the Clinic | <a href="http://www.jto.org/issue/S1556-0864(15)X0004-9">http://www.jto.org/issue/S1556-0864(15)X0004-9</a>                                                                                 |
| Third AACR–IASLC Joint Conference on Molecular Origins of Lung Cancer                                                                 | <a href="http://clincancerres.aacrjournals.org/content/20/2_Supplement.toc">http://clincancerres.aacrjournals.org/content/20/2_Supplement.toc</a>                                           |
| AACR– IASLC Joint Conference on Molecular Origins of Lung Cancer: Biology, Therapy, and Personalized Medicine                         | <a href="http://clincancerres.aacrjournals.org/content/18/3_Supplement.toc">clincancerres.aacrjournals.org/content/18/3_Supplement.toc</a>                                                  |
| AACR-NCI-EORTC                                                                                                                        | <a href="http://mct.aacrjournals.org/search">http://mct.aacrjournals.org/search</a>                                                                                                         |
| American Cancer Society Biannual Survivorship Conference                                                                              | <a href="https://survivorshipconference.cancer.org/">https://survivorshipconference.cancer.org/</a>                                                                                         |
| American Society of Clinical Oncology (ASCO)                                                                                          | <a href="http://meetinglibrary.asco.org/">http://meetinglibrary.asco.org/</a>                                                                                                               |
| ASCO Genitourinary (GU)                                                                                                               | <a href="http://meetinglibrary.asco.org/">http://meetinglibrary.asco.org/</a>                                                                                                               |
| ASCO Head and Neck                                                                                                                    |                                                                                                                                                                                             |
| ASCO Thoracic                                                                                                                         |                                                                                                                                                                                             |
| American Society of Hematology (ASH)                                                                                                  |                                                                                                                                                                                             |
| American Society of Radiation Oncology (ASTRO)                                                                                        | <a href="http://www.redjournal.org/content/astro_abstracts">http://www.redjournal.org/content/astro_abstracts</a>                                                                           |
| American Society of Psychosocial Oncology (APOS)                                                                                      | <a href="http://onlinelibrary.wiley.com/journal/10.1002/(ISSN)1099-1611">http://onlinelibrary.wiley.com/journal/10.1002/(ISSN)1099-1611</a>                                                 |
| European Association for Cancer Research (EACR)                                                                                       | <a href="http://eacr24.eacr.org/">http://eacr24.eacr.org/</a>                                                                                                                               |
| European Lung Cancer Conference (ELCC)                                                                                                | <a href="http://www.esmo.org/Conferences/Past-Conferences/ELCC-2017-Lung-Cancer">http://www.esmo.org/Conferences/Past-Conferences/ELCC-2017-Lung-Cancer</a>                                 |
| European Society for Medical Oncology (ESMO)                                                                                          | <a href="http://www.esmo.org/">http://www.esmo.org/</a>                                                                                                                                     |
| ESMO Immunooncology conference                                                                                                        | <a href="http://www.esmo.org/Conferences/ESMO-Immuno-Oncology-Congress-2017">http://www.esmo.org/Conferences/ESMO-Immuno-Oncology-Congress-2017</a>                                         |
| ESMO World Congress on Gastrointestinal Cancer                                                                                        | <a href="http://www.esmo.org/Conferences/Past-Conferences/World-GI-2017-Gastrointestinal-Cancer">http://www.esmo.org/Conferences/Past-Conferences/World-GI-2017-Gastrointestinal-Cancer</a> |
| European Society for Radiotherapy & Oncology (ESTRO)                                                                                  | <a href="http://oncologypro.esmo.org/Meeting-Resources">http://oncologypro.esmo.org/Meeting-Resources</a>                                                                                   |
| International Association for the Study of Lung Cancer (IASLC)                                                                        |                                                                                                                                                                                             |
| International Society of Psychosocial Oncology (IPOS)                                                                                 | <a href="http://ipos-society.org/">http://ipos-society.org/</a>                                                                                                                             |
| Multinational Association for Supportive Care in Cancer (MASCC)                                                                       | <a href="http://www.mascc.org/">http://www.mascc.org/</a>                                                                                                                                   |
| Society of Behavioral Medicine                                                                                                        | <a href="http://www.sbm.org/">http://www.sbm.org/</a>                                                                                                                                       |
| Society for Melanoma Research                                                                                                         | <a href="https://www.societymelanomaresearch.org/">https://www.societymelanomaresearch.org/</a>                                                                                             |
| Society for Immunotherapy in Oncology (SITC)                                                                                          | <a href="https://www.sitcancer.org/home">https://www.sitcancer.org/home</a>                                                                                                                 |

<sup>a</sup>Keywords used: alemtuzumab, nivolumab, pembrolizumab, pidilizumab, BMS 936559, durvalumab, Atezolizumab, Avelumab, Ipilimumab, Tremelimumab, rituximab, ofatumumab

<sup>b</sup>Keywords were searched one at a time, and results for each search were exported into EndNote.

**Supplementary Table 2: Ratings of Potential for Study Bias**

| Publication                   | Random Sequence Generation | Allocation concealment | Blinding of participants and personnel | Blinding of outcome assessors | Incomplete outcome data | Selective outcome reporting | Other sources of bias | Overall Risk of bias |
|-------------------------------|----------------------------|------------------------|----------------------------------------|-------------------------------|-------------------------|-----------------------------|-----------------------|----------------------|
| Ascierto, et al. 2017 (1)     | low                        | low                    | low                                    | low                           | low                     | low                         | low                   | low                  |
| Barlesi, et al. 2019 (2)      | low                        | low                    | high                                   | low                           | low                     | low                         | low                   | high                 |
| Bordoni, et al. 2017 (3)      | low                        | low                    | high                                   | low                           | low                     | low                         | low                   | high                 |
| Brahmer, et al. 2017 (4)      | low                        | low                    | high                                   | low                           | low                     | low                         | low                   | high                 |
| Cella, et al. 2016 (5)        | low                        | low                    | high                                   | low                           | low                     | low                         | low                   | high                 |
| Coens, et al. 2017 (6)        | low                        | low                    | low                                    | low                           | low                     | low                         | low                   | low                  |
| El-Khoueiry, et al. 2017 (7)  | high                       | high                   | high                                   | low                           | low                     | low                         | low                   | high                 |
| Harrington, et al. 2017 (8)   | low                        | low                    | high                                   | low                           | low                     | low                         | low                   | high                 |
| Hui, et al. 2019 (9)          | low                        | low                    | low                                    | low                           | low                     | low                         | low                   | low                  |
| Kaufman, et al. 2017 (10)     | high                       | high                   | high                                   | low                           | low                     | unclear                     | low                   | high                 |
| Larkin, et al. 2018 (11)      | low                        | low                    | high                                   | low                           | high                    | low                         | unclear               | high                 |
| Long, et al. 2016 (12)        | low                        | low                    | low                                    | low                           | unclear                 | low                         | low                   | low                  |
| Mathias, et al. 2015 (13)     | high                       | high                   | high                                   | unclear                       | unclear                 | unclear                     | unclear               | high                 |
| Mazieres, et al. 2018 (14)    | low                        | low                    | low                                    | low                           | low                     | unclear                     | unclear               | low                  |
| O'Donnell, et al. 2018 (15)   | high                       | high                   | high                                   | low                           | unclear                 | low                         | unclear               | high                 |
| Perol, et al. 2019 (16)       | high                       | high                   | high                                   | low                           | unclear                 | low                         | unclear               | high                 |
| Petrella, et al. 2017 (17)    | low                        | low                    | high                                   | low                           | low                     | low                         | unclear               | high                 |
| Powles, et al. 2018 (18)      | low                        | low                    | high                                   | low                           | low                     | low                         | unclear               | high                 |
| Reck, et al. 2018 (19)        | low                        | low                    | high                                   | low                           | low                     | low                         | low                   | high                 |
| Revicki, et al. 2012 (20)     | low                        | low                    | low                                    | low                           | low                     | unclear                     | low                   | low                  |
| Schadendorf, et al. 2016 (21) | low                        | low                    | high                                   | low                           | low                     | low                         | low                   | high                 |
| Schadendorf, et al. 2017 (22) | low                        | low                    | low                                    | low                           | low                     | low                         | low                   | low                  |
| Sharma, et al. 2017 (23)      | high                       | high                   | high                                   | low                           | low                     | low                         | low                   | high                 |
| Vaughn, et al. 2018 (24)      | low                        | low                    | high                                   | low                           | low                     | low                         | low                   | high                 |
| Weber, et al. 2017 (25)       | low                        | low                    | low                                    | low                           | unclear                 | unclear                     | low                   | low                  |
| Younes, et al. 2016 (26)      | high                       | high                   | high                                   | low                           | low                     | low                         | low                   | high                 |

**Supplementary Table 3: Ratings of Quality of Patient-Reported Outcomes (PRO) Reporting<sup>a</sup>**

| Publication                   | PRO identified in abstract as primary or secondary outcomes | PRO hypothesis and relevant domains | PRO validity or reliability provided or cited | Method of data collection | Statistical approaches for missing data described | PRO-specific limitations and implications presented | Sum |
|-------------------------------|-------------------------------------------------------------|-------------------------------------|-----------------------------------------------|---------------------------|---------------------------------------------------|-----------------------------------------------------|-----|
| Ascierto, et al. 2017 (1)     | 0                                                           | 0                                   | 1                                             | 0                         | 1                                                 | 1                                                   | 3   |
| Barlesi, et al. 2019 (2)      | 1                                                           | 0                                   | 1                                             | 1                         | 1                                                 | 1                                                   | 5   |
| Bordoni, et al. 2017 (3)      | 1                                                           | 0                                   | 1                                             | 0                         | 0                                                 | 1                                                   | 3   |
| Brahmer, et al. 2017 (4)      | 1                                                           | 0                                   | 1                                             | 0                         | 1                                                 | 1                                                   | 4   |
| Cella, et al. 2016 (5)        | 1                                                           | 0                                   | 1                                             | 0                         | 1                                                 | 1                                                   | 4   |
| Coens, et al. 2017 (6)        | 1                                                           | 1                                   | 1                                             | 0                         | 1                                                 | 1                                                   | 5   |
| El-Khoueiry, et al. 2017 (7)  | 0                                                           | 0                                   | 1                                             | 1                         | 1                                                 | 0                                                   | 3   |
| Harrington, et al. 2017 (8)   | 1                                                           | 0                                   | 1                                             | 1                         | 1                                                 | 1                                                   | 5   |
| Hui, et al. 2019 (9)          | 1                                                           | 0                                   | 1                                             | 1                         | 1                                                 | 1                                                   | 5   |
| Kaufman, et al. 2017 (10)     | 1                                                           | 0                                   | 1                                             | 1                         | 0                                                 | 1                                                   | 4   |
| Larkin, et al. 2018 (11)      | 0                                                           | 0                                   | 1                                             | 0                         | 0                                                 | 0                                                   | 1   |
| Long, et al. 2016 (12)        | 1                                                           | 0                                   | 1                                             | 1                         | 1                                                 | 1                                                   | 5   |
| Mathias, et al. 2015 (13)     | 1                                                           | 0                                   | 0                                             | 0                         | 0                                                 | 0                                                   | 1   |
| Mazieres, et al. 2018 (14)    | 1                                                           | 0                                   | 0                                             | 0                         | 0                                                 | 0                                                   | 1   |
| O'Donnell, et al. 2018 (15)   | 1                                                           | 0                                   | 0                                             | 0                         | 0                                                 | 0                                                   | 1   |
| Perol, et al. 2019 (16)       | 1                                                           | 0                                   | 0                                             | 0                         | 0                                                 | 0                                                   | 1   |
| Petrella, et al. 2017 (17)    | 1                                                           | 1                                   | 1                                             | 1                         | 1                                                 | 1                                                   | 6   |
| Powles, et al. 2018 (18)      | 0                                                           | 0                                   | 1                                             | 1                         | 0                                                 | 0                                                   | 2   |
| Reck, et al. 2018 (19)        | 1                                                           | 0                                   | 1                                             | 1                         | 1                                                 | 1                                                   | 5   |
| Revicki, et al. 2012 (20)     | 1                                                           | 0                                   | 1                                             | 1                         | 0                                                 | 1                                                   | 4   |
| Schadendorf, et al. 2016 (21) | 1                                                           | 0                                   | 0                                             | 0                         | 1                                                 | 1                                                   | 3   |
| Schadendorf, et al. 2017 (22) | 1                                                           | 0                                   | 0                                             | 0                         | 1                                                 | 1                                                   | 3   |
| Sharma, et al. 2017 (23)      | 0                                                           | 0                                   | 1                                             | 0                         | 0                                                 | 0                                                   | 1   |
| Vaughn, et al. 2018 (24)      | 1                                                           | 0                                   | 0                                             | 1                         | 1                                                 | 1                                                   | 4   |
| Weber, et al. 2017 (25)       | 0                                                           | 0                                   | 1                                             | 0                         | 1                                                 | 0                                                   | 2   |
| Younes, et al. 2016 (26)      | 0                                                           | 0                                   | 0                                             | 0                         | 0                                                 | 0                                                   | 0   |

<sup>a</sup>0=absent, 1=present

## Supplementary Figures

**Supplementary Figure 1: Meta-Analysis of Within-Group Change in Physical Functioning in Patients Receiving Immune Checkpoint Inhibitor Therapy.** Positive values indicate improvement. Error bars represent 95% confidence intervals (CIs). Random effect models were used with a two-sided alpha level of .05. NSCLC = non-small cell lung cancer.

| Model  | Group by Drug type | Study name       | Cancer type | Drug type     | Outcome              | Statistics for each study |             |             |         | Sample size | Difference in means and 95% CI |        |        |      |       |
|--------|--------------------|------------------|-------------|---------------|----------------------|---------------------------|-------------|-------------|---------|-------------|--------------------------------|--------|--------|------|-------|
|        |                    |                  |             |               |                      | Difference in means       | Lower limit | Upper limit | p-Value |             | Total                          | -20.00 | -10.00 | 0.00 | 10.00 |
| Random | Atezolizumab       | Bordoni 2017     | NSCLC       | Atezolizumab  | Physical functioning | 4.470                     | 2.902       | 6.038       | 0.000   | 413         |                                |        |        |      |       |
|        | Atezolizumab       | Powles 2018      | Urothelial  | Atezolizumab  | Physical functioning | -3.810                    | -5.966      | -1.654      | 0.001   | 254         |                                |        |        |      |       |
| Random | Atezolizumab       |                  |             |               |                      | 0.364                     | -7.750      | 8.478       | 0.930   |             |                                |        |        |      |       |
|        | Durvalumab         | Hui 2019         | NSCLC       | Durvalumab    | Physical functioning | 2.300                     | 0.732       | 3.868       | 0.004   | 476         |                                |        |        |      |       |
| Random | Durvalumab         |                  |             |               |                      | 2.300                     | 0.732       | 3.868       | 0.004   |             |                                |        |        |      |       |
|        | Ipilimumab         | Revicki 2012     | Melanoma    | Ipilimumab    | Physical functioning | -5.100                    | -9.337      | -0.863      | 0.018   | 83          |                                |        |        |      |       |
| Random | Ipilimumab         | Mathias 2015     | Melanoma    | Ipilimumab    | Physical functioning | -15.900                   | -27.072     | -4.728      | 0.005   | 101         |                                |        |        |      |       |
|        | Ipilimumab         | Coens 2017       | Melanoma    | Ipilimumab    | Physical functioning | -1.640                    | -2.424      | -0.856      | 0.000   | 475         |                                |        |        |      |       |
| Random | Ipilimumab         |                  |             |               |                      | -5.014                    | -10.144     | 0.115       | 0.055   |             |                                |        |        |      |       |
|        | Nivolumab          | Harrington 2017  | Head & Neck | Nivolumab     | Physical functioning | -1.900                    | -5.688      | 1.888       | 0.326   | 43          |                                |        |        |      |       |
| Random | Nivolumab          | Long 2016        | Melanoma    | Nivolumab     | Physical functioning | -4.400                    | -7.536      | -1.264      | 0.006   | 136         |                                |        |        |      |       |
|        | Nivolumab          | Younes 2016      | Hodgkin     | Nivolumab     | Physical functioning | 5.500                     | 1.188       | 9.812       | 0.012   | 60          |                                |        |        |      |       |
| Random | Nivolumab          | Schadendorf 2017 | Melanoma    | Nivolumab     | Physical functioning | -4.500                    | -6.460      | -2.540      | 0.000   | 266         |                                |        |        |      |       |
|        | Nivolumab          |                  |             |               |                      | -1.630                    | -5.523      | 2.263       | 0.412   |             |                                |        |        |      |       |
| Random | Pembrolizumab      | Petrella 2017    | Melanoma    | Pembrolizumab | Physical functioning | -3.460                    | -6.033      | -0.887      | 0.008   | 270         |                                |        |        |      |       |
|        | Pembrolizumab      | Brahmer 2017     | NSCLC       | Pembrolizumab | Physical functioning | 1.180                     | -1.776      | 4.136       | 0.434   | 150         |                                |        |        |      |       |
| Random | Pembrolizumab      | Vaughn 2018      | Urothelial  | Pembrolizumab | Physical functioning | -6.180                    | -9.345      | -3.015      | 0.000   | 266         |                                |        |        |      |       |
|        | Pembrolizumab      | Schadendorf 2016 | Melanoma    | Pembrolizumab | Physical functioning | -4.200                    | -7.428      | -0.972      | 0.011   | 176         |                                |        |        |      |       |
| Random | Pembrolizumab      |                  |             |               |                      | -3.132                    | -6.124      | -0.139      | 0.040   |             |                                |        |        |      |       |
|        | Overall            |                  |             |               |                      | 0.460                     | -0.792      | 1.712       | 0.472   |             |                                |        |        |      |       |

**Supplementary Figure 2. Meta-Analysis of Differences in Mean Change in Physical Functioning from Baseline to Follow-Up in Physical Functioning at Follow-up in Patients Treated with Immune Checkpoint Inhibitors versus Other Regimens.** Positive values favor immune checkpoint inhibitors. Error bars represent 95% confidence intervals (CIs). Random effect models were used with a two-sided alpha level of .05. NSCLC = non-small cell lung cancer.

| Model  | Group by Drug type | Study name       | Outcome              | Sample size |                  | Cancer type | Drug type     | Statistics for each study |             |             |         | Difference in means and 95% CI |        |      |       |       |
|--------|--------------------|------------------|----------------------|-------------|------------------|-------------|---------------|---------------------------|-------------|-------------|---------|--------------------------------|--------|------|-------|-------|
|        |                    |                  |                      | ID          | Standard of care |             |               | Difference in means       | Lower limit | Upper limit | p-Value | -20.00                         | -10.00 | 0.00 | 10.00 | 20.00 |
| Random | Atezolizumab       | Powles 2018      | Physical functioning | 202         | 254              | Urothelial  | Atezolizumab  | 0.600                     | -0.385      | 1.585       | 0.233   |                                |        |      |       |       |
|        | Atezolizumab       | Bordonni 2017    | Physical functioning | 413         | 390              | NSCLC       | Atezolizumab  | 6.640                     | 3.295       | 9.985       | 0.000   |                                |        |      |       |       |
| Random | Durvalumab         | Hui 2019         | Physical functioning | 476         | 237              | NSCLC       | Durvalumab    | -0.400                    | -1.157      | 0.357       | 0.301   |                                |        |      |       |       |
| Random | Durvalumab         |                  |                      |             |                  |             |               | -0.400                    | -1.157      | 0.357       | 0.301   |                                |        |      |       |       |
| Random | Ipilimumab         | Coens 2017       | Physical functioning | 449         | 444              | Melanoma    | Ipilimumab    | -2.720                    | -3.115      | -2.325      | 0.000   |                                |        |      |       |       |
|        | Ipilimumab         | Revicki 2012     | Physical functioning | 83          | 78               | Melanoma    | Ipilimumab    | 5.000                     | -0.905      | 10.905      | 0.097   |                                |        |      |       |       |
| Random | Ipilimumab         | Mathias 2015     | Physical functioning | 101         | 28               | Melanoma    | Ipilimumab    | 6.900                     | 0.730       | 13.070      | 0.028   |                                |        |      |       |       |
| Random | Ipilimumab         |                  |                      |             |                  |             |               | 2.549                     | -4.483      | 9.581       | 0.477   |                                |        |      |       |       |
| Random | Nivolumab          | Long 2016        | Physical functioning | 136         | 123              | Melanoma    | Nivolumab     | -1.700                    | -7.124      | 3.724       | 0.539   |                                |        |      |       |       |
|        | Nivolumab          | Harrington 2017  | Physical functioning | 43          | 14               | Head & Neck | Nivolumab     | 18.000                    | 15.847      | 20.153      | 0.000   |                                |        |      |       |       |
| Random | Nivolumab          |                  |                      |             |                  |             |               | 8.314                     | -10.989     | 27.617      | 0.399   |                                |        |      |       |       |
| Random | Pembrolizumab      | Schadendorf 2016 | Physical functioning | 176         | 167              | Melanoma    | Pembrolizumab | 1.000                     | -0.487      | 2.487       | 0.187   |                                |        |      |       |       |
|        | Pembrolizumab      | Vaughn 2018      | Physical functioning | 266         | 253              | Urothelial  | Pembrolizumab | 5.660                     | 4.100       | 7.220       | 0.000   |                                |        |      |       |       |
| Random | Pembrolizumab      | Brahmer 2017     | Physical functioning | 150         | 147              | NSCLC       | Pembrolizumab | 5.230                     | 3.840       | 6.620       | 0.000   |                                |        |      |       |       |
| Random | Pembrolizumab      |                  |                      |             |                  |             |               | 3.963                     | 1.071       | 6.856       | 0.007   |                                |        |      |       |       |
| Random | Overall            |                  |                      |             |                  |             |               | -0.027                    | -0.750      | 0.696       | 0.941   |                                |        |      |       |       |

**Supplementary Figure 3: Change From Baseline to Follow-up in Symptomatology in Patients Receiving Immune Checkpoint Inhibitors.** Analyses were done for A) appetite loss, B) constipation, C) diarrhea, D) dyspnea, E) fatigue, F) insomnia, G) nausea and vomiting, and H) pain. Error bars represent 95% confidence intervals (CIs). Random effect models were used with a two-sided alpha level of .05. NSCLC = non-small cell lung cancer.

**A. Appetite Loss**

| Model  | Group by Drug type | Study name       | Cancer type | Drug type     | Outcome       | Statistics for each study |             |             |         | Sample size | Difference in means and 95% CI |        |        |      |       |
|--------|--------------------|------------------|-------------|---------------|---------------|---------------------------|-------------|-------------|---------|-------------|--------------------------------|--------|--------|------|-------|
|        |                    |                  |             |               |               | Difference in means       | Lower limit | Upper limit | p-Value |             | Total                          | -20.00 | -10.00 | 0.00 | 10.00 |
| Random | Atezolizumab       | Bordoni 2017     | NSCLC       | Atezolizumab  | Appetite loss | -8.040                    | -10.392     | -5.688      | 0.000   | 413         |                                |        |        |      |       |
|        | Atezolizumab       |                  |             |               |               | -8.040                    | -10.392     | -5.688      | 0.000   |             |                                |        |        |      |       |
| Random | Durvalumab         | Hui 2019         | NSCLC       | Durvalumab    | Appetite loss | -5.100                    | -7.648      | -2.552      | 0.000   | 476         |                                |        |        |      |       |
|        | Durvalumab         |                  |             |               |               | -5.100                    | -7.648      | -2.552      | 0.000   |             |                                |        |        |      |       |
| Random | Ipilimumab         | Revicki 2012     | Melanoma    | Ipilimumab    | Appetite loss | 11.600                    | 5.393       | 17.807      | 0.000   | 83          |                                |        |        |      |       |
|        | Ipilimumab         | Mathias 2015     | Melanoma    | Ipilimumab    | Appetite loss | 15.000                    | -0.092      | 30.092      | 0.051   | 101         |                                |        |        |      |       |
|        | Ipilimumab         | Coens 2017       | Melanoma    | Ipilimumab    | Appetite loss | 4.870                     | 3.694       | 6.046       | 0.000   | 475         |                                |        |        |      |       |
|        | Ipilimumab         |                  |             |               |               | 8.459                     | 2.382       | 14.537      | 0.006   |             |                                |        |        |      |       |
|        | Ipilimumab         |                  |             |               |               |                           |             |             |         |             |                                |        |        |      |       |
| Random | Nivolumab          | Harrington 2017  | Head & Neck | Nivolumab     | Appetite loss | -2.200                    | -9.581      | 5.181       | 0.559   | 43          |                                |        |        |      |       |
|        | Nivolumab          | Long 2016        | Melanoma    | Nivolumab     | Appetite loss | -3.600                    | -7.520      | 0.320       | 0.072   | 136         |                                |        |        |      |       |
|        | Nivolumab          | Younes 2016      | Hodgkin     | Nivolumab     | Appetite loss | -6.600                    | -12.872     | -0.328      | 0.039   | 60          |                                |        |        |      |       |
|        | Nivolumab          | Schadendorf 2017 | Melanoma    | Nivolumab     | Appetite loss | 3.200                     | 0.848       | 5.552       | 0.008   | 266         |                                |        |        |      |       |
|        | Nivolumab          |                  |             |               |               | -1.866                    | -6.835      | 3.103       | 0.462   |             |                                |        |        |      |       |
| Random | Pembrolizumab      | Petrella 2017    | Melanoma    | Pembrolizumab | Appetite loss | 0.130                     | -3.419      | 3.679       | 0.943   | 270         |                                |        |        |      |       |
|        | Pembrolizumab      | Barlesi 2019     | NSCLC       | Pembrolizumab | Appetite loss | -3.780                    | -6.681      | -0.879      | 0.011   | 331         |                                |        |        |      |       |
|        | Pembrolizumab      | Brahmer 2017     | NSCLC       | Pembrolizumab | Appetite loss | -10.920                   | -15.830     | -6.010      | 0.000   | 150         |                                |        |        |      |       |
|        | Pembrolizumab      | Vaughn 2018      | Urothelial  | Pembrolizumab | Appetite loss | 2.380                     | -2.060      | 6.820       | 0.293   | 266         |                                |        |        |      |       |
|        | Pembrolizumab      | Schadendorf 2016 | Melanoma    | Pembrolizumab | Appetite loss | -1.700                    | -6.566      | 3.166       | 0.494   | 176         |                                |        |        |      |       |
|        | Pembrolizumab      |                  |             |               |               | -2.681                    | -6.581      | 1.219       | 0.178   |             |                                |        |        |      |       |
| Random | Overall            |                  |             |               |               | -4.832                    | -6.293      | -3.370      | 0.000   |             |                                |        |        |      |       |

**B. Constipation**

| Model  | Group by Drug type | Study name       | Cancer type | Drug type     | Outcome      | Statistics for each study |             |             |         | Sample size | Difference in means and 95% CI |        |        |      |       |
|--------|--------------------|------------------|-------------|---------------|--------------|---------------------------|-------------|-------------|---------|-------------|--------------------------------|--------|--------|------|-------|
|        |                    |                  |             |               |              | Difference in means       | Lower limit | Upper limit | p-Value |             | Total                          | -20.00 | -10.00 | 0.00 | 10.00 |
| Random | Atezolizumab       | Bordoni 2017     | NSCLC       | Atezolizumab  | Constipation | -3.610                    | -5.766      | -1.454      | 0.001   | 410         |                                |        |        |      |       |
|        | Atezolizumab       |                  |             |               |              | -3.610                    | -5.766      | -1.454      | 0.001   |             |                                |        |        |      |       |
| Random | Durvalumab         | Hui 2019         | NSCLC       | Durvalumab    | Constipation | -5.500                    | -7.852      | -3.148      | 0.000   | 476         |                                |        |        |      |       |
|        | Durvalumab         |                  |             |               |              | -5.500                    | -7.852      | -3.148      | 0.000   |             |                                |        |        |      |       |
| Random | Ipilimumab         | Revicki 2012     | Melanoma    | Ipilimumab    | Constipation | 1.900                     | -3.371      | 7.171       | 0.480   | 83          |                                |        |        |      |       |
|        | Ipilimumab         | Mathias 2015     | Melanoma    | Ipilimumab    | Constipation | -1.700                    | -13.264     | 9.864       | 0.773   | 100         |                                |        |        |      |       |
|        | Ipilimumab         | Coens 2017       | Melanoma    | Ipilimumab    | Constipation | 0.400                     | -0.384      | 1.184       | 0.317   | 475         |                                |        |        |      |       |
|        | Ipilimumab         |                  |             |               |              | 0.423                     | -0.351      | 1.197       | 0.284   |             |                                |        |        |      |       |
|        | Ipilimumab         |                  |             |               |              |                           |             |             |         |             |                                |        |        |      |       |
| Random | Nivolumab          | Harrington 2017  | Head & Neck | Nivolumab     | Constipation | -3.400                    | -9.134      | 2.334       | 0.245   | 44          |                                |        |        |      |       |
|        | Nivolumab          | Long 2016        | Melanoma    | Nivolumab     | Constipation | 0.100                     | -4.016      | 4.216       | 0.962   | 136         |                                |        |        |      |       |
|        | Nivolumab          | Younes 2016      | Hodgkin     | Nivolumab     | Constipation | -3.000                    | -9.468      | 3.468       | 0.363   | 60          |                                |        |        |      |       |
|        | Nivolumab          | Schadendorf 2017 | Melanoma    | Nivolumab     | Constipation | 1.400                     | -0.560      | 3.360       | 0.162   | 266         |                                |        |        |      |       |
|        | Nivolumab          |                  |             |               |              | 0.101                     | -2.027      | 2.230       | 0.926   |             |                                |        |        |      |       |
| Random | Pembrolizumab      | Petrella 2017    | Melanoma    | Pembrolizumab | Constipation | 1.040                     | -2.121      | 4.201       | 0.519   | 270         |                                |        |        |      |       |
|        | Pembrolizumab      | Barlesi 2019     | NSCLC       | Pembrolizumab | Constipation | -4.450                    | -7.314      | -1.586      | 0.002   | 331         |                                |        |        |      |       |
|        | Pembrolizumab      | Brahmer 2017     | NSCLC       | Pembrolizumab | Constipation | -2.950                    | -6.496      | 0.596       | 0.103   | 150         |                                |        |        |      |       |
|        | Pembrolizumab      | Vaughn 2018      | Urothelial  | Pembrolizumab | Constipation | -4.620                    | -8.821      | -0.419      | 0.031   | 266         |                                |        |        |      |       |
|        | Pembrolizumab      | Schadendorf 2016 | Melanoma    | Pembrolizumab | Constipation | 2.500                     | -1.671      | 6.671       | 0.240   | 176         |                                |        |        |      |       |
|        | Pembrolizumab      |                  |             |               |              | -1.752                    | -4.553      | 1.049       | 0.220   |             |                                |        |        |      |       |
| Random | Overall            |                  |             |               |              | -0.524                    | -1.168      | 0.120       | 0.110   |             |                                |        |        |      |       |

**C. Diarrhea**

| Model  | Group by Drug type | Study name       | Cancer type | Drug type     | Outcome  | Statistics for each study |             |             |         | Sample size | Difference in means and 95% CI |        |        |      |       |
|--------|--------------------|------------------|-------------|---------------|----------|---------------------------|-------------|-------------|---------|-------------|--------------------------------|--------|--------|------|-------|
|        |                    |                  |             |               |          | Difference in means       | Lower limit | Upper limit | p-Value |             | Total                          | -20.00 | -10.00 | 0.00 | 10.00 |
| Random | Atezolizumab       | Bordoni 2017     | NSCLC       | Atezolizumab  | Diarrhea | -0.910                    | -2.282      | 0.462       | 0.194   | 411         |                                |        |        |      |       |
|        | Atezolizumab       |                  |             |               |          | -0.910                    | -2.282      | 0.462       | 0.194   |             |                                |        |        |      |       |
| Random | Durvalumab         | Hui 2019         | NSCLC       | Durvalumab    | Diarrhea | 1.100                     | -0.664      | 2.864       | 0.222   | 476         |                                |        |        |      |       |
|        | Durvalumab         |                  |             |               |          | 1.100                     | -0.664      | 2.864       | 0.222   |             |                                |        |        |      |       |
| Random | Ipilimumab         | Revicki 2012     | Melanoma    | Ipilimumab    | Diarrhea | 9.100                     | 3.534       | 14.666      | 0.001   | 82          |                                |        |        |      |       |
|        | Ipilimumab         | Mathias 2015     | Melanoma    | Ipilimumab    | Diarrhea | 3.100                     | -7.680      | 13.880      | 0.573   | 101         |                                |        |        |      |       |
|        | Ipilimumab         | Coens 2017       | Melanoma    | Ipilimumab    | Diarrhea | 1.820                     | 1.036       | 2.604       | 0.000   | 475         |                                |        |        |      |       |
|        | Ipilimumab         |                  |             |               |          | 4.426                     | -0.922      | 9.775       | 0.105   |             |                                |        |        |      |       |
|        | Ipilimumab         |                  |             |               |          |                           |             |             |         |             |                                |        |        |      |       |
| Random | Nivolumab          | Harrington 2017  | Head & Neck | Nivolumab     | Diarrhea | -1.200                    | -5.185      | 2.785       | 0.555   | 44          |                                |        |        |      |       |
|        | Nivolumab          | Long 2016        | Melanoma    | Nivolumab     | Diarrhea | -0.500                    | -3.636      | 2.636       | 0.755   | 136         |                                |        |        |      |       |
|        | Nivolumab          | Younes 2016      | Hodgkin     | Nivolumab     | Diarrhea | 3.000                     | -3.664      | 9.664       | 0.378   | 60          |                                |        |        |      |       |
|        | Nivolumab          | Schadendorf 2017 | Melanoma    | Nivolumab     | Diarrhea | -0.400                    | -1.576      | 0.776       | 0.505   | 266         |                                |        |        |      |       |
|        | Nivolumab          |                  |             |               |          | -0.382                    | -1.431      | 0.666       | 0.475   |             |                                |        |        |      |       |
| Random | Pembrolizumab      | Petrella 2017    | Melanoma    | Pembrolizumab | Diarrhea | 2.020                     | -1.230      | 5.270       | 0.223   | 270         |                                |        |        |      |       |
|        | Pembrolizumab      | Barlesi 2019     | NSCLC       | Pembrolizumab | Diarrhea | -0.160                    | -2.337      | 2.017       | 0.885   | 331         |                                |        |        |      |       |
|        | Pembrolizumab      | Brahmer 2017     | NSCLC       | Pembrolizumab | Diarrhea | -0.740                    | -3.195      | 1.715       | 0.555   | 150         |                                |        |        |      |       |
|        | Pembrolizumab      | Vaughn 2018      | Urothelial  | Pembrolizumab | Diarrhea | 0.290                     | -2.691      | 3.271       | 0.849   | 266         |                                |        |        |      |       |
|        | Pembrolizumab      | Schadendorf 2016 | Melanoma    | Pembrolizumab | Diarrhea | -1.700                    | -4.779      | 1.379       | 0.279   | 176         |                                |        |        |      |       |
|        | Pembrolizumab      |                  |             |               |          | -0.163                    | -1.367      | 1.042       | 0.791   |             |                                |        |        |      |       |
| Random | Overall            |                  |             |               |          | -0.175                    | -0.809      | 0.459       | 0.588   |             |                                |        |        |      |       |

## D. Dyspnea

| Model  | Group by Drug type | Study name       | Cancer type | Drug type     | Outcome | Statistics for each study |             |             |         | Sample size | Difference in means and 95% CI |        |        |      |       |
|--------|--------------------|------------------|-------------|---------------|---------|---------------------------|-------------|-------------|---------|-------------|--------------------------------|--------|--------|------|-------|
|        |                    |                  |             |               |         | Difference in means       | Lower limit | Upper limit | p-Value |             | Total                          | -20.00 | -10.00 | 0.00 | 10.00 |
| Random | Atezolizumab       | Bordoni 2017     | NSCLC       | Atezolizumab  | Dyspnea | -5.160                    | -7.512      | -2.808      | 0.000   | 412         |                                |        |        |      |       |
|        | Atezolizumab       |                  |             |               |         | -5.160                    | -7.512      | -2.808      | 0.000   |             |                                |        |        |      |       |
| Random | Durvalumab         | Hui 2019         | NSCLC       | Durvalumab    | Dyspnea | 0.800                     | -1.748      | 3.348       | 0.538   | 476         |                                |        |        |      |       |
|        | Durvalumab         |                  |             |               |         | 0.800                     | -1.748      | 3.348       | 0.538   |             |                                |        |        |      |       |
| Random | Ipilimumab         | Revicki 2012     | Melanoma    | Ipilimumab    | Dyspnea | 5.300                     | -0.018      | 10.618      | 0.051   | 81          |                                |        |        |      |       |
|        | Ipilimumab         | Mathias 2015     | Melanoma    | Ipilimumab    | Dyspnea | 8.400                     | -3.752      | 20.552      | 0.175   | 101         |                                |        |        |      |       |
|        | Ipilimumab         | Coens 2017       | Melanoma    | Ipilimumab    | Dyspnea | 6.530                     | 5.354       | 7.706       | 0.000   | 475         |                                |        |        |      |       |
|        | Ipilimumab         |                  |             |               |         | 6.490                     | 5.347       | 7.633       | 0.000   |             |                                |        |        |      |       |
|        | Ipilimumab         |                  |             |               |         |                           |             |             |         |             |                                |        |        |      |       |
| Random | Nivolumab          | Harrington 2017  | Head & Neck | Nivolumab     | Dyspnea | -1.500                    | -7.230      | 4.230       | 0.608   | 43          |                                |        |        |      |       |
|        | Nivolumab          | Long 2016        | Melanoma    | Nivolumab     | Dyspnea | 0.500                     | -3.616      | 4.616       | 0.812   | 136         |                                |        |        |      |       |
|        | Nivolumab          | Younes 2016      | Hodgkin     | Nivolumab     | Dyspnea | -4.800                    | -9.896      | 0.296       | 0.065   | 60          |                                |        |        |      |       |
|        | Nivolumab          | Schadendorf 2017 | Melanoma    | Nivolumab     | Dyspnea | -0.300                    | -2.260      | 1.660       | 0.764   | 266         |                                |        |        |      |       |
|        | Nivolumab          |                  |             |               |         | -0.734                    | -2.375      | 0.906       | 0.380   |             |                                |        |        |      |       |
| Random | Pembrolizumab      | Petrella 2017    | Melanoma    | Pembrolizumab | Dyspnea | -0.420                    | -3.561      | 2.721       | 0.793   | 270         |                                |        |        |      |       |
|        | Pembrolizumab      | Barlesi 2019     | NSCLC       | Pembrolizumab | Dyspnea | -0.280                    | -3.493      | 2.933       | 0.864   | 331         |                                |        |        |      |       |
|        | Pembrolizumab      | Brahmer 2017     | NSCLC       | Pembrolizumab | Dyspnea | -8.800                    | -13.075     | -4.525      | 0.000   | 150         |                                |        |        |      |       |
|        | Pembrolizumab      | Vaughn 2018      | Urothelial  | Pembrolizumab | Dyspnea | 2.380                     | -1.194      | 5.954       | 0.192   | 266         |                                |        |        |      |       |
|        | Pembrolizumab      | Schadendorf 2016 | Melanoma    | Pembrolizumab | Dyspnea | 1.700                     | -2.421      | 5.821       | 0.419   | 176         |                                |        |        |      |       |
| Random | Pembrolizumab      |                  |             |               |         |                           |             |             |         |             |                                |        |        |      |       |
| Random | Overall            |                  |             |               |         | 2.443                     | 1.641       | 3.244       | 0.000   |             |                                |        |        |      |       |

## E. Fatigue

| Model  | Group by Drug type | Study name       | Cancer type | Drug type     | Outcome | Statistics for each study |             |             |         | Sample size | Difference in means and 95% CI |        |        |      |       |
|--------|--------------------|------------------|-------------|---------------|---------|---------------------------|-------------|-------------|---------|-------------|--------------------------------|--------|--------|------|-------|
|        |                    |                  |             |               |         | Difference in means       | Lower limit | Upper limit | p-Value |             | Total                          | -20.00 | -10.00 | 0.00 | 10.00 |
| Random | Atezolizumab       | Bordoni 2017     | NSCLC       | Atezolizumab  | Fatigue | -7.320                    | -9.280      | -5.360      | 0.000   | 413         |                                |        |        |      |       |
|        | Atezolizumab       | Powles 2018      | Urothelial  | Atezolizumab  | Fatigue | 3.670                     | 0.769       | 6.571       | 0.013   | 254         |                                |        |        |      |       |
| Random | Durvalumab         | Hui 2019         | NSCLC       | Durvalumab    | Fatigue | -1.879                    | -12.649     | 8.890       | 0.732   | 476         |                                |        |        |      |       |
|        | Durvalumab         |                  |             |               |         | -4.000                    | -5.960      | -2.040      | 0.000   | 476         |                                |        |        |      |       |
| Random | Ipilimumab         | Revicki 2012     | Melanoma    | Ipilimumab    | Fatigue | 12.500                    | 7.033       | 17.967      | 0.000   | 82          |                                |        |        |      |       |
|        | Ipilimumab         | Mathias 2015     | Melanoma    | Ipilimumab    | Fatigue | 15.200                    | 3.048       | 27.352      | 0.014   | 101         |                                |        |        |      |       |
|        | Ipilimumab         | Coens 2017       | Melanoma    | Ipilimumab    | Fatigue | 6.970                     | 5.598       | 8.342       | 0.000   | 475         |                                |        |        |      |       |
|        | Ipilimumab         |                  |             |               |         | 9.869                     | 4.916       | 14.823      | 0.000   |             |                                |        |        |      |       |
|        | Ipilimumab         |                  |             |               |         |                           |             |             |         |             |                                |        |        |      |       |
| Random | Nivolumab          | Harrington 2017  | Head & Neck | Nivolumab     | Fatigue | -1.100                    | -5.859      | 3.659       | 0.651   | 43          |                                |        |        |      |       |
|        | Nivolumab          | Long 2016        | Melanoma    | Nivolumab     | Fatigue | 2.000                     | -1.724      | 5.724       | 0.293   | 136         |                                |        |        |      |       |
|        | Nivolumab          | Younes 2016      | Hodgkin     | Nivolumab     | Fatigue | -6.900                    | -12.780     | -1.020      | 0.021   | 60          |                                |        |        |      |       |
|        | Nivolumab          | Schadendorf 2017 | Melanoma    | Nivolumab     | Fatigue | 4.700                     | 2.544       | 6.856       | 0.000   | 266         |                                |        |        |      |       |
|        | Nivolumab          |                  |             |               |         | 0.244                     | -4.223      | 4.712       | 0.915   |             |                                |        |        |      |       |
| Random | Pembrolizumab      | Petrella 2017    | Melanoma    | Pembrolizumab | Fatigue | 3.740                     | 0.639       | 6.841       | 0.018   | 270         |                                |        |        |      |       |
|        | Pembrolizumab      | Barlesi 2019     | NSCLC       | Pembrolizumab | Fatigue | 1.020                     | -1.864      | 3.904       | 0.488   | 331         |                                |        |        |      |       |
|        | Pembrolizumab      | Brahmer 2017     | NSCLC       | Pembrolizumab | Fatigue | -7.160                    | -10.845     | -3.475      | 0.000   | 150         |                                |        |        |      |       |
|        | Pembrolizumab      | Vaughn 2018      | Urothelial  | Pembrolizumab | Fatigue | 2.140                     | -1.314      | 5.594       | 0.225   | 266         |                                |        |        |      |       |
|        | Pembrolizumab      | Schadendorf 2016 | Melanoma    | Pembrolizumab | Fatigue | 3.300                     | -0.474      | 7.074       | 0.087   | 176         |                                |        |        |      |       |
| Random | Pembrolizumab      |                  |             |               |         |                           |             |             |         |             |                                |        |        |      |       |
| Random | Overall            |                  |             |               |         | -1.365                    | -2.881      | 0.151       | 0.078   |             |                                |        |        |      |       |

## F. Insomnia

| Model  | Group by Drug type | Study name       | Cancer type | Drug type     | Outcome  | Statistics for each study |             |             |         | Sample size | Difference in means and 95% CI |        |        |      |       |
|--------|--------------------|------------------|-------------|---------------|----------|---------------------------|-------------|-------------|---------|-------------|--------------------------------|--------|--------|------|-------|
|        |                    |                  |             |               |          | Difference in means       | Lower limit | Upper limit | p-Value |             | Total                          | -20.00 | -10.00 | 0.00 | 10.00 |
| Random | Atezolizumab       | Bordoni 2017     | NSCLC       | Atezolizumab  | Insomnia | -2.740                    | -5.092      | -0.388      | 0.022   | 413         |                                |        |        |      |       |
|        | Atezolizumab       |                  |             |               |          | -2.740                    | -5.092      | -0.388      | 0.022   |             |                                |        |        |      |       |
| Random | Durvalumab         | Hui 2019         | NSCLC       | Durvalumab    | Insomnia | 1.300                     | -1.248      | 3.848       | 0.317   | 476         |                                |        |        |      |       |
|        | Durvalumab         |                  |             |               |          | 1.300                     | -1.248      | 3.848       | 0.317   |             |                                |        |        |      |       |
| Random | Ipilimumab         | Revicki 2012     | Melanoma    | Ipilimumab    | Insomnia | 10.100                    | 3.696       | 16.504      | 0.002   | 83          |                                |        |        |      |       |
|        | Ipilimumab         | Mathias 2015     | Melanoma    | Ipilimumab    | Insomnia | 12.100                    | -2.208      | 26.408      | 0.097   | 98          |                                |        |        |      |       |
|        | Ipilimumab         | Coens 2017       | Melanoma    | Ipilimumab    | Insomnia | 0.220                     | -1.152      | 1.592       | 0.753   | 475         |                                |        |        |      |       |
|        | Ipilimumab         |                  |             |               |          | 6.126                     | -2.447      | 14.699      | 0.161   |             |                                |        |        |      |       |
|        | Ipilimumab         |                  |             |               |          |                           |             |             |         |             |                                |        |        |      |       |
| Random | Nivolumab          | Harrington 2017  | Head & Neck | Nivolumab     | Insomnia | -4.400                    | -10.713     | 1.913       | 0.172   | 43          |                                |        |        |      |       |
|        | Nivolumab          | Long 2016        | Melanoma    | Nivolumab     | Insomnia | -7.200                    | -11.512     | -2.888      | 0.001   | 136         |                                |        |        |      |       |
|        | Nivolumab          | Younes 2016      | Hodgkin     | Nivolumab     | Insomnia | -4.200                    | -12.040     | 3.640       | 0.294   | 60          |                                |        |        |      |       |
|        | Nivolumab          | Schadendorf 2017 | Melanoma    | Nivolumab     | Insomnia | -4.000                    | -6.156      | -1.844      | 0.000   | 266         |                                |        |        |      |       |
|        | Nivolumab          |                  |             |               |          | -4.598                    | -6.393      | -2.802      | 0.000   |             |                                |        |        |      |       |
| Random | Pembrolizumab      | Petrella 2017    | Melanoma    | Pembrolizumab | Insomnia | -2.570                    | -6.442      | 1.302       | 0.193   | 270         |                                |        |        |      |       |
|        | Pembrolizumab      | Barlesi 2019     | NSCLC       | Pembrolizumab | Insomnia | -3.740                    | -6.641      | -0.839      | 0.012   | 331         |                                |        |        |      |       |
|        | Pembrolizumab      | Brahmer 2017     | NSCLC       | Pembrolizumab | Insomnia | -7.810                    | -12.492     | -3.128      | 0.001   | 150         |                                |        |        |      |       |
|        | Pembrolizumab      | Vaughn 2018      | Urothelial  | Pembrolizumab | Insomnia | -1.030                    | -4.932      | 2.872       | 0.605   | 266         |                                |        |        |      |       |
|        | Pembrolizumab      | Schadendorf 2016 | Melanoma    | Pembrolizumab | Insomnia | -0.600                    | -5.317      | 4.117       | 0.803   | 176         |                                |        |        |      |       |
| Random | Pembrolizumab      |                  |             |               |          |                           |             |             |         |             |                                |        |        |      |       |
| Random | Overall            |                  |             |               |          | -2.635                    | -3.710      | -1.560      | 0.000   |             |                                |        |        |      |       |

## G. Nausea and Vomiting

| Model  | Group by Drug type | Study name       | Cancer type | Drug type     | Outcome             | Statistics for each study |             |             |         | Sample size | Difference in means and 95% CI |        |        |      |       |
|--------|--------------------|------------------|-------------|---------------|---------------------|---------------------------|-------------|-------------|---------|-------------|--------------------------------|--------|--------|------|-------|
|        |                    |                  |             |               |                     | Difference in means       | Lower limit | Upper limit | p-Value |             | Total                          | -20.00 | -10.00 | 0.00 | 10.00 |
| Random | Atezolizumab       | Bordoni 2017     | NSCLC       | Atezolizumab  | Nausea and vomiting | -1.150                    | -2.522      | 0.222       | 0.100   | 413         |                                |        |        |      |       |
|        | Atezolizumab       |                  |             |               |                     | -1.150                    | -2.522      | 0.222       | 0.100   |             |                                |        |        |      |       |
| Random | Durvalumab         | Hui 2019         | NSCLC       | Durvalumab    | Nausea and vomiting | -3.400                    | -4.576      | -2.224      | 0.000   | 476         |                                |        |        |      |       |
|        | Durvalumab         |                  |             |               |                     | -3.400                    | -4.576      | -2.224      | 0.000   |             |                                |        |        |      |       |
| Random | Ipilimumab         | Revicki 2012     | Melanoma    | Ipilimumab    | Nausea and vomiting | 3.100                     | -0.989      | 7.189       | 0.137   | 83          |                                |        |        |      |       |
|        | Ipilimumab         | Mathias 2015     | Melanoma    | Ipilimumab    | Nausea and vomiting | -0.700                    | -8.736      | 7.336       | 0.864   | 101         |                                |        |        |      |       |
|        | Ipilimumab         | Coens 2017       | Melanoma    | Ipilimumab    | Nausea and vomiting | 1.560                     | 0.972       | 2.148       | 0.000   | 475         |                                |        |        |      |       |
|        | Ipilimumab         |                  |             |               |                     | 1.579                     | 0.999       | 2.160       | 0.000   |             |                                |        |        |      |       |
|        | Ipilimumab         | Harrington 2017  | Head & Neck | Nivolumab     | Nausea and vomiting | 2.100                     | -2.270      | 6.470       | 0.346   | 43          |                                |        |        |      |       |
| Random | Nivolumab          | Long 2016        | Melanoma    | Nivolumab     | Nausea and vomiting | -2.600                    | -4.560      | -0.640      | 0.009   | 136         |                                |        |        |      |       |
|        | Nivolumab          | Younes 2016      | Hodgkin     | Nivolumab     | Nausea and vomiting | 0.000                     | -3.724      | 3.724       | 1.000   | 60          |                                |        |        |      |       |
|        | Nivolumab          | Schadendorf 2017 | Melanoma    | Nivolumab     | Nausea and vomiting | 1.300                     | 0.124       | 2.476       | 0.030   | 266         |                                |        |        |      |       |
|        | Nivolumab          |                  |             |               |                     | 0.019                     | -2.385      | 2.423       | 0.987   |             |                                |        |        |      |       |
|        | Nivolumab          | Petrella 2017    | Melanoma    | Pembrolizumab | Nausea and vomiting | -1.900                    | -3.935      | 0.335       | 0.099   | 270         |                                |        |        |      |       |
| Random | Pembrolizumab      | Barlesi 2019     | NSCLC       | Pembrolizumab | Nausea and vomiting | -0.280                    | -2.417      | 1.857       | 0.797   | 331         |                                |        |        |      |       |
|        | Pembrolizumab      | Brahmer 2017     | NSCLC       | Pembrolizumab | Nausea and vomiting | -2.120                    | -4.803      | 0.563       | 0.121   | 150         |                                |        |        |      |       |
|        | Pembrolizumab      | Vaughn 2018      | Urothelial  | Pembrolizumab | Nausea and vomiting | 1.000                     | -1.713      | 3.713       | 0.470   | 266         |                                |        |        |      |       |
|        | Pembrolizumab      | Schadendorf 2016 | Melanoma    | Pembrolizumab | Nausea and vomiting | 1.500                     | -1.231      | 4.231       | 0.282   | 176         |                                |        |        |      |       |
|        | Pembrolizumab      |                  |             |               |                     | -0.437                    | -1.790      | 0.917       | 0.527   |             |                                |        |        |      |       |
| Random | Overall            |                  |             |               | 0.280               | -0.170                    | 0.730       | 0.223       |         |             |                                |        |        |      |       |

## H. Pain

| Model  | Group by Drug type | Study name       | Cancer type | Drug type     | Outcome | Statistics for each study |             |             |         | Sample size | Difference in means and 95% CI |        |        |      |       |
|--------|--------------------|------------------|-------------|---------------|---------|---------------------------|-------------|-------------|---------|-------------|--------------------------------|--------|--------|------|-------|
|        |                    |                  |             |               |         | Difference in means       | Lower limit | Upper limit | p-Value |             | Total                          | -20.00 | -10.00 | 0.00 | 10.00 |
| Random | Atezolizumab       | Bordoni 2017     | NSCLC       | Atezolizumab  | Pain    | -8.350                    | -10.702     | -5.998      | 0.000   | 413         |                                |        |        |      |       |
|        | Atezolizumab       |                  |             |               |         | -8.350                    | -10.702     | -5.998      | 0.000   |             |                                |        |        |      |       |
| Random | Durvalumab         | Hui 2019         | NSCLC       | Durvalumab    | Pain    | -0.700                    | -3.052      | 1.652       | 0.560   | 476         |                                |        |        |      |       |
|        | Durvalumab         |                  |             |               |         | -0.700                    | -3.052      | 1.652       | 0.560   |             |                                |        |        |      |       |
| Random | Ipilimumab         | Revicki 2012     | Melanoma    | Ipilimumab    | Pain    | 7.900                     | 2.284       | 13.516      | 0.006   | 83          |                                |        |        |      |       |
|        | Ipilimumab         | Mathias 2015     | Melanoma    | Ipilimumab    | Pain    | 7.400                     | -5.144      | 19.944      | 0.248   | 103         |                                |        |        |      |       |
|        | Ipilimumab         | Coens 2017       | Melanoma    | Ipilimumab    | Pain    | 0.160                     | -1.016      | 1.336       | 0.790   | 475         |                                |        |        |      |       |
|        | Ipilimumab         |                  |             |               |         | 4.120                     | -2.279      | 10.519      | 0.207   |             |                                |        |        |      |       |
|        | Ipilimumab         | Harrington 2017  | Head & Neck | Nivolumab     | Pain    | -2.600                    | -8.723      | 3.523       | 0.405   | 44          |                                |        |        |      |       |
| Random | Nivolumab          | Long 2016        | Melanoma    | Nivolumab     | Pain    | -1.100                    | -6.000      | 3.800       | 0.660   | 136         |                                |        |        |      |       |
|        | Nivolumab          | Younes 2016      | Hodgkin     | Nivolumab     | Pain    | -6.300                    | -11.984     | -0.616      | 0.030   | 60          |                                |        |        |      |       |
|        | Nivolumab          | Schadendorf 2017 | Melanoma    | Nivolumab     | Pain    | 0.900                     | -1.452      | 3.252       | 0.453   | 266         |                                |        |        |      |       |
|        | Nivolumab          |                  |             |               |         | -1.558                    | -4.700      | 1.585       | 0.331   |             |                                |        |        |      |       |
|        | Nivolumab          | Petrella 2017    | Melanoma    | Pembrolizumab | Pain    | -0.680                    | -4.188      | 2.828       | 0.704   | 270         |                                |        |        |      |       |
| Random | Pembrolizumab      | Barlesi 2019     | NSCLC       | Pembrolizumab | Pain    | -0.280                    | -3.533      | 2.973       | 0.866   | 331         |                                |        |        |      |       |
|        | Pembrolizumab      | Brahmer 2017     | NSCLC       | Pembrolizumab | Pain    | -11.200                   | -15.019     | -7.381      | 0.000   | 150         |                                |        |        |      |       |
|        | Pembrolizumab      | Vaughn 2018      | Urothelial  | Pembrolizumab | Pain    | -0.910                    | -4.693      | 2.873       | 0.637   | 266         |                                |        |        |      |       |
|        | Pembrolizumab      | Schadendorf 2016 | Melanoma    | Pembrolizumab | Pain    | 0.900                     | -3.222      | 4.822       | 0.697   | 176         |                                |        |        |      |       |
|        | Pembrolizumab      |                  |             |               |         | -2.435                    | -6.606      | 1.737       | 0.253   |             |                                |        |        |      |       |
| Random | Overall            |                  |             |               | -3.365  | -4.720                    | -2.010      | 0.000       |         |             |                                |        |        |      |       |

**Supplementary Figure 4: Comparing Mean Change in Symptomatology From Baseline to Follow-Up in Patients Receiving Immune Checkpoint Inhibitors (ICIs) Compared to Patients Not Treated With ICI.** Analyses were done for A) appetite loss, B) constipation, C) diarrhea, D) dyspnea, E) fatigue, F) insomnia, G) nausea, and H) pain. Error bars represent 95% confidence intervals (CIs). Random effect models were used with a two-sided alpha level of .05. IO = immune checkpoint inhibitor group. NSCLC = non-small cell lung cancer

**A. Appetite Loss**

| Model  | Group by Drug type | Study name       | Outcome       | Sample size |                  | Cancer type | Drug type     | Statistics for each study |             |             |         | Difference in means and 95% CI |        |      |       |       |
|--------|--------------------|------------------|---------------|-------------|------------------|-------------|---------------|---------------------------|-------------|-------------|---------|--------------------------------|--------|------|-------|-------|
|        |                    |                  |               | IO          | Standard of care |             |               | Difference in means       | Lower limit | Upper limit | p-Value | -30.00                         | -15.00 | 0.00 | 15.00 | 30.00 |
| Random | Atezolizumab       | Bordoni 2017     | Appetite loss | 413         | 390              | NSCLC       | Atezolizumab  | -0.440                    | -1.246      | 0.366       | 0.285   |                                |        |      |       |       |
|        | Atezolizumab       |                  |               |             |                  |             |               | -0.440                    | -1.246      | 0.366       | 0.285   |                                |        |      |       |       |
| Random | Durvalumab         | Hui 2019         | Appetite loss | 476         | 237              | NSCLC       | Durvalumab    | 3.700                     | 2.468       | 4.932       | 0.000   |                                |        |      |       |       |
|        | Durvalumab         |                  |               |             |                  |             |               | 3.700                     | 2.468       | 4.932       | 0.000   |                                |        |      |       |       |
| Random | Ipilimumab         | Coens 2017       | Appetite loss | 448         | 444              | Melanoma    | Ipilimumab    | 4.690                     | 4.196       | 5.184       | 0.000   |                                |        |      |       |       |
|        | Ipilimumab         | Revicki 2012     | Appetite loss | 83          | 78               | Melanoma    | Ipilimumab    | 1.300                     | -7.383      | 9.983       | 0.769   |                                |        |      |       |       |
|        | Ipilimumab         | Mathias 2015     | Appetite loss | 101         | 28               | Melanoma    | Ipilimumab    | -8.500                    | -16.856     | -0.144      | 0.046   |                                |        |      |       |       |
| Random | Ipilimumab         |                  |               |             |                  |             |               | -0.098                    | -8.043      | 7.848       | 0.981   |                                |        |      |       |       |
|        | Nivolumab          | Long 2016        | Appetite loss | 136         | 123              | Melanoma    | Nivolumab     | -5.200                    | -12.167     | 1.767       | 0.144   |                                |        |      |       |       |
| Random | Nivolumab          | Harrington 2017  | Appetite loss | 43          | 14               | Head & Neck | Nivolumab     | -23.100                   | -27.304     | -18.896     | 0.000   |                                |        |      |       |       |
|        | Nivolumab          |                  |               |             |                  |             |               | -14.374                   | -31.911     | 3.162       | 0.108   |                                |        |      |       |       |
| Random | Pembrolizumab      | Schadendorf 2016 | Appetite loss | 176         | 167              | Melanoma    | Pembrolizumab | -5.000                    | -7.248      | -2.752      | 0.000   |                                |        |      |       |       |
|        | Pembrolizumab      | Barlesi 2019     | Appetite loss | 331         | 293              | NSCLC       | Pembrolizumab | -4.020                    | -5.665      | -2.375      | 0.000   |                                |        |      |       |       |
|        | Pembrolizumab      | Vaughn 2019      | Appetite loss | 266         | 253              | Urothelial  | Pembrolizumab | -6.590                    | -8.720      | -4.440      | 0.000   |                                |        |      |       |       |
|        | Pembrolizumab      | Brahmer 2017     | Appetite loss | 150         | 147              | NSCLC       | Pembrolizumab | -7.610                    | -9.902      | -5.318      | 0.000   |                                |        |      |       |       |
| Random | Pembrolizumab      |                  |               |             |                  |             | -5.696        | -7.329                    | -4.062      | 0.000       |         |                                |        |      |       |       |
| Random | Overall            |                  |               |             |                  |             | -0.162        | -0.783                    | 0.459       | 0.609       |         |                                |        |      |       |       |

**B. Constipation**

| Model  | Group by Drug type | Study name       | Outcome      | Sample size |                  | Cancer type | Drug type     | Statistics for each study |             |             |         | Difference in means and 95% CI |        |      |       |       |
|--------|--------------------|------------------|--------------|-------------|------------------|-------------|---------------|---------------------------|-------------|-------------|---------|--------------------------------|--------|------|-------|-------|
|        |                    |                  |              | IO          | Standard of care |             |               | Difference in means       | Lower limit | Upper limit | p-Value | -20.00                         | -10.00 | 0.00 | 10.00 | 20.00 |
| Random | Atezolizumab       | Bordoni 2017     | Constipation | 410         | 388              | NSCLC       | Atezolizumab  | -0.330                    | -4.673      | 4.013       | 0.882   |                                |        |      |       |       |
|        | Atezolizumab       |                  |              |             |                  |             |               | -0.330                    | -4.673      | 4.013       | 0.882   |                                |        |      |       |       |
| Random | Durvalumab         | Hui 2019         | Constipation | 476         | 237              | NSCLC       | Durvalumab    | -0.100                    | -1.265      | 1.065       | 0.866   |                                |        |      |       |       |
|        | Durvalumab         |                  |              |             |                  |             |               | -0.100                    | -1.265      | 1.065       | 0.866   |                                |        |      |       |       |
| Random | Ipilimumab         | Coens 2017       | Constipation | 448         | 444              | Melanoma    | Ipilimumab    | 0.750                     | 0.368       | 1.132       | 0.000   |                                |        |      |       |       |
|        | Ipilimumab         | Revicki 2012     | Constipation | 83          | 77               | Melanoma    | Ipilimumab    | -9.900                    | -17.343     | -2.457      | 0.009   |                                |        |      |       |       |
|        | Ipilimumab         | Mathias 2015     | Constipation | 100         | 28               | Melanoma    | Ipilimumab    | -4.700                    | -11.080     | 1.680       | 0.149   |                                |        |      |       |       |
| Random | Ipilimumab         |                  |              |             |                  |             |               | -3.819                    | -10.378     | 2.740       | 0.254   |                                |        |      |       |       |
|        | Nivolumab          | Long 2016        | Constipation | 136         | 123              | Melanoma    | Nivolumab     | -1.700                    | -9.712      | 6.312       | 0.678   |                                |        |      |       |       |
| Random | Nivolumab          | Harrington 2017  | Constipation | 44          | 13               | Head & Neck | Nivolumab     | -1.000                    | -4.242      | 2.242       | 0.545   |                                |        |      |       |       |
|        | Nivolumab          |                  |              |             |                  |             |               | -1.098                    | -4.104      | 1.907       | 0.474   |                                |        |      |       |       |
| Random | Pembrolizumab      | Schadendorf 2016 | Constipation | 176         | 167              | Melanoma    | Pembrolizumab | -2.600                    | -4.535      | -0.665      | 0.008   |                                |        |      |       |       |
|        | Pembrolizumab      | Barlesi 2019     | Constipation | 331         | 293              | NSCLC       | Pembrolizumab | -2.360                    | -3.754      | -0.966      | 0.001   |                                |        |      |       |       |
|        | Pembrolizumab      | Vaughn 2018      | Constipation | 266         | 253              | Urothelial  | Pembrolizumab | -7.660                    | -9.668      | -5.652      | 0.000   |                                |        |      |       |       |
|        | Pembrolizumab      | Brahmer 2017     | Constipation | 150         | 147              | NSCLC       | Pembrolizumab | -6.510                    | -8.206      | -4.814      | 0.000   |                                |        |      |       |       |
| Random | Pembrolizumab      |                  |              |             |                  |             | -4.749        | -7.381                    | -2.116      | 0.000       |         |                                |        |      |       |       |
| Random | Overall            |                  |              |             |                  |             | -0.923        | -1.891                    | 0.044       | 0.061       |         |                                |        |      |       |       |

**C. Diarrhea**

| Model  | Group by Drug type | Study name       | Outcome  | Sample size |                  | Cancer type | Drug type     | Statistics for each study |             |             |         | Difference in means and 95% CI |        |      |       |       |
|--------|--------------------|------------------|----------|-------------|------------------|-------------|---------------|---------------------------|-------------|-------------|---------|--------------------------------|--------|------|-------|-------|
|        |                    |                  |          | IO          | Standard of care |             |               | Difference in means       | Lower limit | Upper limit | p-Value | -20.00                         | -10.00 | 0.00 | 10.00 | 20.00 |
| Random | Atezolizumab       | Bordoni 2017     | Diarrhea | 411         | 388              | NSCLC       | Atezolizumab  | -2.050                    | -5.012      | 0.912       | 0.175   |                                |        |      |       |       |
|        | Atezolizumab       |                  |          |             |                  |             |               | -2.050                    | -5.012      | 0.912       | 0.175   |                                |        |      |       |       |
| Random | Durvalumab         | Hui 2019         | Diarrhea | 476         | 237              | NSCLC       | Durvalumab    | 1.900                     | 1.045       | 2.755       | 0.000   |                                |        |      |       |       |
|        | Durvalumab         |                  |          |             |                  |             |               | 1.900                     | 1.045       | 2.755       | 0.000   |                                |        |      |       |       |
| Random | Ipilimumab         | Coens 2017       | Diarrhea | 445         | 443              | Melanoma    | Ipilimumab    | 0.950                     | 0.529       | 1.371       | 0.000   |                                |        |      |       |       |
|        | Ipilimumab         | Revicki 2012     | Diarrhea | 82          | 78               | Melanoma    | Ipilimumab    | 6.900                     | -0.890      | 14.690      | 0.083   |                                |        |      |       |       |
|        | Ipilimumab         | Mathias 2015     | Diarrhea | 101         | 29               | Melanoma    | Ipilimumab    | 1.300                     | -4.593      | 7.193       | 0.665   |                                |        |      |       |       |
| Random | Ipilimumab         |                  |          |             |                  |             |               | 1.218                     | -0.394      | 2.830       | 0.139   |                                |        |      |       |       |
|        | Nivolumab          | Long 2016        | Diarrhea | 136         | 123              | Melanoma    | Nivolumab     | -0.300                    | -6.322      | 5.722       | 0.922   |                                |        |      |       |       |
| Random | Nivolumab          | Harrington 2017  | Diarrhea | 44          | 13               | Head & Neck | Nivolumab     | -7.100                    | -9.420      | -4.780      | 0.000   |                                |        |      |       |       |
|        | Nivolumab          |                  |          |             |                  |             |               | -4.291                    | -10.853     | 2.271       | 0.200   |                                |        |      |       |       |
| Random | Pembrolizumab      | Schadendorf 2016 | Diarrhea | 176         | 167              | Melanoma    | Pembrolizumab | -3.100                    | -4.520      | -1.680      | 0.000   |                                |        |      |       |       |
|        | Pembrolizumab      | Barlesi 2019     | Diarrhea | 331         | 293              | NSCLC       | Pembrolizumab | -3.980                    | -5.037      | -2.923      | 0.000   |                                |        |      |       |       |
|        | Pembrolizumab      | Vaughn 2018      | Diarrhea | 266         | 253              | Urothelial  | Pembrolizumab | -4.960                    | -6.428      | -3.492      | 0.000   |                                |        |      |       |       |
|        | Pembrolizumab      | Brahmer 2017     | Diarrhea | 150         | 147              | NSCLC       | Pembrolizumab | -1.190                    | -2.356      | -0.024      | 0.045   |                                |        |      |       |       |
| Random | Pembrolizumab      |                  |          |             |                  |             | -3.283        | -4.874                    | -1.693      | 0.000       |         |                                |        |      |       |       |
| Random | Overall            |                  |          |             |                  |             | 0.628         | -0.033                    | 1.290       | 0.063       |         |                                |        |      |       |       |

## D. Dyspnea

| Model  | Group by Drug type | Study name       | Outcome | Sample size |                  | Cancer type | Drug type     | Statistics for each study |             |             |         | Difference in means and 95% CI |        |      |       |       |  |  |
|--------|--------------------|------------------|---------|-------------|------------------|-------------|---------------|---------------------------|-------------|-------------|---------|--------------------------------|--------|------|-------|-------|--|--|
|        |                    |                  |         | IO          | Standard of care |             |               | Difference in means       | Lower limit | Upper limit | p-Value | -30.00                         | -15.00 | 0.00 | 15.00 | 30.00 |  |  |
| Random | Atezolizumab       | Bordoni 2017     | Dyspnea | 412         | 389              | NSCLC       | Atezolizumab  | -1.680                    | -2.476      | -0.884      | 0.000   |                                |        |      |       |       |  |  |
|        | Atezolizumab       |                  |         |             |                  |             |               | -1.680                    | -2.476      | -0.884      | 0.000   |                                |        |      |       |       |  |  |
| Random | Durvalumab         | Hui 2019         | Dyspnea | 476         | 237              | NSCLC       | Durvalumab    | 3.900                     | 2.592       | 5.208       | 0.000   |                                |        |      |       |       |  |  |
|        | Durvalumab         |                  |         |             |                  |             |               | 3.900                     | 2.592       | 5.208       | 0.000   |                                |        |      |       |       |  |  |
| Random | Ipilimumab         | Coens 2017       | Dyspnea | 449         | 443              | Melanoma    | Ipilimumab    | 4.920                     | 4.372       | 5.468       | 0.000   |                                |        |      |       |       |  |  |
|        | Ipilimumab         | Revicki 2012     | Dyspnea | 81          | 77               | Melanoma    | Ipilimumab    | -3.800                    | -11.192     | 3.592       | 0.314   |                                |        |      |       |       |  |  |
|        | Ipilimumab         | Mathias 2015     | Dyspnea | 101         | 28               | Melanoma    | Ipilimumab    | -6.200                    | -12.910     | 0.510       | 0.070   |                                |        |      |       |       |  |  |
|        | Ipilimumab         |                  |         |             |                  |             |               | -1.128                    | -9.315      | 7.059       | 0.787   |                                |        |      |       |       |  |  |
| Random | Nivolumab          | Long 2016        | Dyspnea | 136         | 123              | Melanoma    | Nivolumab     | -6.900                    | -14.166     | 0.366       | 0.063   |                                |        |      |       |       |  |  |
|        | Nivolumab          | Harrington 2017  | Dyspnea | 43          | 14               | Head &      | Nivolumab     | -25.200                   | -28.450     | -21.950     | 0.000   |                                |        |      |       |       |  |  |
|        | Nivolumab          |                  |         |             |                  |             |               | -16.350                   | -34.274     | 1.574       | 0.074   |                                |        |      |       |       |  |  |
| Random | Pembrolizumab      | Schadendorf 2016 | Dyspnea | 176         | 167              | Melanoma    | Pembrolizumab | -5.100                    | -7.001      | -3.199      | 0.000   |                                |        |      |       |       |  |  |
|        | Pembrolizumab      | Barlesi 2019     | Dyspnea | 331         | 293              | NSCLC       | Pembrolizumab | -2.760                    | -4.332      | -1.188      | 0.001   |                                |        |      |       |       |  |  |
|        | Pembrolizumab      | Vaughn 2018      | Dyspnea | 266         | 253              | Urothelial  | Pembrolizumab | -9.760                    | -11.508     | -8.012      | 0.000   |                                |        |      |       |       |  |  |
|        | Pembrolizumab      | Brahmer 2017     | Dyspnea | 150         | 147              | NSCLC       | Pembrolizumab | -8.330                    | -10.337     | -6.323      | 0.000   |                                |        |      |       |       |  |  |
|        | Pembrolizumab      |                  |         |             |                  |             |               | -6.469                    | -9.745      | -3.192      | 0.000   |                                |        |      |       |       |  |  |
| Random | Overall            |                  |         |             |                  |             | -0.457        | -1.120                    | 0.207       | 0.177       |         |                                |        |      |       |       |  |  |

## E. Fatigue

| Model  | Group by Drug type | Study name       | Outcome | Sample size |                  | Cancer type | Drug type     | Statistics for each study |             |             |         | Difference in means and 95% CI |        |      |       |       |  |  |
|--------|--------------------|------------------|---------|-------------|------------------|-------------|---------------|---------------------------|-------------|-------------|---------|--------------------------------|--------|------|-------|-------|--|--|
|        |                    |                  |         | IO          | Standard of care |             |               | Difference in means       | Lower limit | Upper limit | p-Value | -30.00                         | -15.00 | 0.00 | 15.00 | 30.00 |  |  |
| Random | Atezolizumab       | Powles 2018      | Fatigue | 202         | 254              | Urothelial  | Atezolizumab  | -3.810                    | -5.153      | -2.467      | 0.000   |                                |        |      |       |       |  |  |
|        | Atezolizumab       | Bordoni 2017     | Fatigue | 413         | 390              | NSCLC       | Atezolizumab  | -6.010                    | -6.679      | -5.341      | 0.000   |                                |        |      |       |       |  |  |
| Random | Durvalumab         | Hui 2019         | Fatigue | 476         | 237              | NSCLC       | Durvalumab    | 2.100                     | 1.160       | 3.040       | 0.000   |                                |        |      |       |       |  |  |
|        | Durvalumab         |                  |         |             |                  |             |               | 2.100                     | 1.160       | 3.040       | 0.000   |                                |        |      |       |       |  |  |
| Random | Ipilimumab         | Coens 2017       | Fatigue | 449         | 444              | Melanoma    | Ipilimumab    | 5.380                     | 4.806       | 5.954       | 0.000   |                                |        |      |       |       |  |  |
|        | Ipilimumab         | Revicki 2012     | Fatigue | 82          | 78               | Melanoma    | Ipilimumab    | -2.000                    | -9.591      | 5.591       | 0.606   |                                |        |      |       |       |  |  |
|        | Ipilimumab         | Mathias 2015     | Fatigue | 101         | 27               | Melanoma    | Ipilimumab    | -14.300                   | -21.021     | -7.579      | 0.000   |                                |        |      |       |       |  |  |
|        | Ipilimumab         |                  |         |             |                  |             |               | -3.353                    | -15.869     | 9.163       | 0.600   |                                |        |      |       |       |  |  |
| Random | Nivolumab          | Long 2016        | Fatigue | 136         | 123              | Melanoma    | Nivolumab     | -0.200                    | -6.819      | 6.419       | 0.953   |                                |        |      |       |       |  |  |
|        | Nivolumab          | Harrington 2017  | Fatigue | 43          | 14               | Head &      | Nivolumab     | -22.900                   | -25.594     | -20.206     | 0.000   |                                |        |      |       |       |  |  |
|        | Nivolumab          |                  |         |             |                  |             |               | -11.760                   | -34.001     | 10.482      | 0.300   |                                |        |      |       |       |  |  |
| Random | Pembrolizumab      | Schadendorf 2016 | Fatigue | 176         | 167              | Melanoma    | Pembrolizumab | -3.700                    | -5.445      | -1.955      | 0.000   |                                |        |      |       |       |  |  |
|        | Pembrolizumab      | Barlesi 2019     | Fatigue | 331         | 293              | NSCLC       | Pembrolizumab | -5.360                    | -6.663      | -4.057      | 0.000   |                                |        |      |       |       |  |  |
|        | Pembrolizumab      | Vaughn 2018      | Fatigue | 266         | 253              | Urothelial  | Pembrolizumab | -10.000                   | -11.668     | -8.332      | 0.000   |                                |        |      |       |       |  |  |
|        | Pembrolizumab      | Brahmer 2017     | Fatigue | 150         | 147              | NSCLC       | Pembrolizumab | -10.270                   | -11.975     | -8.565      | 0.000   |                                |        |      |       |       |  |  |
|        | Pembrolizumab      |                  |         |             |                  |             |               | -7.322                    | -10.448     | -4.196      | 0.000   |                                |        |      |       |       |  |  |
| Random | Overall            |                  |         |             |                  |             | 0.345         | -0.482                    | 1.173       | 0.413       |         |                                |        |      |       |       |  |  |

## F. Insomnia

| Model  | Group by Drug type | Study name       | Outcome  | Sample size |                  | Cancer type | Drug type     | Statistics for each study |             |             |         | Difference in means and 95% CI |        |      |       |       |  |
|--------|--------------------|------------------|----------|-------------|------------------|-------------|---------------|---------------------------|-------------|-------------|---------|--------------------------------|--------|------|-------|-------|--|
|        |                    |                  |          | IO          | Standard of care |             |               | Difference in means       | Lower limit | Upper limit | p-Value | -30.00                         | -15.00 | 0.00 | 15.00 | 30.00 |  |
| Random | Atezolizumab       | Bordoni 2017     | Insomnia | 413         | 388              | NSCLC       | Atezolizumab  | 4.130                     | 3.333       | 4.927       | 0.000   |                                |        |      |       |       |  |
|        | Atezolizumab       |                  |          |             |                  |             |               | 4.130                     | 3.333       | 4.927       | 0.000   |                                |        |      |       |       |  |
| Random | Durvalumab         | Hui 2019         | Insomnia | 476         | 237              | NSCLC       | Durvalumab    | 0.500                     | -0.718      | 1.718       | 0.421   |                                |        |      |       |       |  |
|        | Durvalumab         |                  |          |             |                  |             |               | 0.500                     | -0.718      | 1.718       | 0.421   |                                |        |      |       |       |  |
| Random | Ipilimumab         | Coens 2017       | Insomnia | 449         | 444              | Melanoma    | Ipilimumab    | 1.250                     | 0.579       | 1.921       | 0.000   |                                |        |      |       |       |  |
|        | Ipilimumab         | Revicki 2012     | Insomnia | 83          | 76               | Melanoma    | Ipilimumab    | -0.900                    | -9.930      | 8.130       | 0.845   |                                |        |      |       |       |  |
|        | Ipilimumab         | Mathias 2015     | Insomnia | 98          | 28               | Melanoma    | Ipilimumab    | -1.300                    | -9.250      | 6.650       | 0.749   |                                |        |      |       |       |  |
|        | Ipilimumab         |                  |          |             |                  |             |               | 1.220                     | 0.553       | 1.887       | 0.000   |                                |        |      |       |       |  |
| Random | Nivolumab          | Long 2016        | Insomnia | 136         | 123              | Melanoma    | Nivolumab     | -2.600                    | -10.662     | 5.462       | 0.527   |                                |        |      |       |       |  |
|        | Nivolumab          | Harrington 2017  | Insomnia | 43          | 14               | Head &      | Nivolumab     | -28.900                   | -32.505     | -25.295     | 0.000   |                                |        |      |       |       |  |
|        | Nivolumab          |                  |          |             |                  |             |               | -16.007                   | -41.776     | 9.761       | 0.223   |                                |        |      |       |       |  |
| Random | Pembrolizumab      | Schadendorf 2016 | Insomnia | 176         | 167              | Melanoma    | Pembrolizumab | -2.800                    | -4.981      | -0.619      | 0.012   |                                |        |      |       |       |  |
|        | Pembrolizumab      | Barlesi 2019     | Insomnia | 331         | 293              | NSCLC       | Pembrolizumab | -2.200                    | -3.845      | -0.555      | 0.009   |                                |        |      |       |       |  |
|        | Pembrolizumab      | Vaughn 2018      | Insomnia | 266         | 253              | Urothelial  | Pembrolizumab | -5.270                    | -7.163      | -3.377      | 0.000   |                                |        |      |       |       |  |
|        | Pembrolizumab      | Brahmer 2017     | Insomnia | 150         | 147              | NSCLC       | Pembrolizumab | -3.310                    | -5.489      | -1.131      | 0.003   |                                |        |      |       |       |  |
|        | Pembrolizumab      |                  |          |             |                  |             |               | -3.378                    | -4.770      | -1.985      | 0.000   |                                |        |      |       |       |  |
| Random | Overall            |                  |          |             |                  |             | 1.559         | 1.113                     | 2.006       | 0.000       |         |                                |        |      |       |       |  |

## G. Nausea

| Model  | Group by Drug type | Study name       | Outcome             | Sample size |                  | Cancer type | Drug type     | Statistics for each study |             |             |         | Difference in means and 95% CI |        |      |       |       |  |
|--------|--------------------|------------------|---------------------|-------------|------------------|-------------|---------------|---------------------------|-------------|-------------|---------|--------------------------------|--------|------|-------|-------|--|
|        |                    |                  |                     | IO          | Standard of care |             |               | Difference in means       | Lower limit | Upper limit | p-Value | -20.00                         | -10.00 | 0.00 | 10.00 | 20.00 |  |
| Random | Atezolizumab       | Bordoni 2017     | Nausea and vomiting | 413         | 389              | NSCLC       | Atezolizumab  | -0.180                    | -3.104      | 2.744       | 0.904   |                                |        |      |       |       |  |
|        | Atezolizumab       |                  |                     |             |                  |             |               | -0.180                    | -3.104      | 2.744       | 0.904   |                                |        |      |       |       |  |
| Random | Durvalumab         | Hui 2019         | Nausea and vomiting | 476         | 237              | NSCLC       | Durvalumab    | 1.600                     | 0.912       | 2.288       | 0.000   |                                |        |      |       |       |  |
|        | Durvalumab         |                  |                     |             |                  |             |               | 1.600                     | 0.912       | 2.288       | 0.000   |                                |        |      |       |       |  |
| Random | Ipilimumab         | Coens 2017       | Nausea and vomiting | 449         | 444              | Melanoma    | Ipilimumab    | 0.740                     | 0.495       | 0.985       | 0.000   |                                |        |      |       |       |  |
|        | Ipilimumab         | Revicki 2012     | Nausea and vomiting | 83          | 78               | Melanoma    | Ipilimumab    | -1.300                    | -7.105      | 4.505       | 0.661   |                                |        |      |       |       |  |
|        | Ipilimumab         | Mathias 2015     | Nausea and vomiting | 101         | 28               | Melanoma    | Ipilimumab    | -12.200                   | -16.662     | -7.738      | 0.000   |                                |        |      |       |       |  |
|        | Ipilimumab         |                  |                     |             |                  |             |               | -4.143                    | -12.502     | 4.215       | 0.331   |                                |        |      |       |       |  |
| Random | Nivolumab          | Long 2016        | Nausea and vomiting | 136         | 123              | Melanoma    | Nivolumab     | -2.600                    | -5.984      | 0.784       | 0.132   |                                |        |      |       |       |  |
|        | Nivolumab          | Harrington 2017  | Nausea and vomiting | 43          | 14               | Head &      | Nivolumab     | -7.800                    | -10.290     | -5.310      | 0.000   |                                |        |      |       |       |  |
|        | Nivolumab          |                  |                     |             |                  |             |               | -5.331                    | -10.421     | -0.242      | 0.040   |                                |        |      |       |       |  |
| Random | Pembrolizumab      | Schadendorf 2016 | Nausea and vomiting | 176         | 167              | Melanoma    | Pembrolizumab | -3.700                    | -4.964      | -2.436      | 0.000   |                                |        |      |       |       |  |
|        | Pembrolizumab      | Barlesi 2019     | Nausea and vomiting | 331         | 293              | NSCLC       | Pembrolizumab | -2.680                    | -3.643      | -1.717      | 0.000   |                                |        |      |       |       |  |
|        | Pembrolizumab      | Vaughn 2018      | Nausea and vomiting | 266         | 253              | Urothelial  | Pembrolizumab | -0.840                    | -2.160      | 0.480       | 0.212   |                                |        |      |       |       |  |
|        | Pembrolizumab      | Brahmer 2017     | Nausea and vomiting | 150         | 147              | NSCLC       | Pembrolizumab | -3.850                    | -5.092      | -2.608      | 0.000   |                                |        |      |       |       |  |
|        | Pembrolizumab      |                  |                     |             |                  |             |               | -2.778                    | -4.024      | -1.531      | 0.000   |                                |        |      |       |       |  |
| Random | Overall            |                  |                     |             |                  |             | 0.446         | -0.139                    | 1.031       | 0.135       |         |                                |        |      |       |       |  |

## H. Pain

| Model  | Group by Drug type | Study name       | Outcome | Sample size |                  | Cancer type | Drug type     | Statistics for each study |             |             |         | Difference in means and 95% CI |        |      |       |       |  |  |
|--------|--------------------|------------------|---------|-------------|------------------|-------------|---------------|---------------------------|-------------|-------------|---------|--------------------------------|--------|------|-------|-------|--|--|
|        |                    |                  |         | IO          | Standard of care |             |               | Difference in means       | Lower limit | Upper limit | p-Value | -20.00                         | -10.00 | 0.00 | 10.00 | 20.00 |  |  |
| Random | Atezolizumab       | Bordonio 2017    | Pain    | 413         | 390              | NSCLC       | Atezolizumab  | -1.060                    | -1.839      | -0.281      | 0.008   |                                |        |      |       |       |  |  |
|        | Atezolizumab       |                  |         |             |                  |             |               | -1.060                    | -1.839      | -0.281      | 0.008   |                                |        |      |       |       |  |  |
| Random | Durvalumab         | Hui 2019         | Pain    | 476         | 237              | NSCLC       | Durvalumab    | 1.800                     | 0.631       | 2.969       | 0.003   |                                |        |      |       |       |  |  |
|        | Durvalumab         |                  |         |             |                  |             |               | 1.800                     | 0.631       | 2.969       | 0.003   |                                |        |      |       |       |  |  |
| Random | Ipilimumab         | Coens 2017       | Pain    | 449         | 444              | Melanoma    | Ipilimumab    | 1.540                     | 1.008       | 2.072       | 0.000   |                                |        |      |       |       |  |  |
|        | Ipilimumab         | Fleivicki 2012   | Pain    | 83          | 78               | Melanoma    | Ipilimumab    | -4.000                    | -11.840     | 3.840       | 0.317   |                                |        |      |       |       |  |  |
|        | Ipilimumab         | Mathias 2015     | Pain    | 103         | 29               | Melanoma    | Ipilimumab    | -11.900                   | -18.835     | -4.965      | 0.001   |                                |        |      |       |       |  |  |
|        | Ipilimumab         |                  |         |             |                  |             |               | -4.310                    | -12.998     | 4.378       | 0.331   |                                |        |      |       |       |  |  |
| Random | Nivolumab          | Long 2016        | Pain    | 136         | 123              | Melanoma    | Nivolumab     | 0.400                     | -9.055      | 9.855       | 0.934   |                                |        |      |       |       |  |  |
|        | Nivolumab          | Harrington 2017  | Pain    | 44          | 14               | Head &      | Nivolumab     | -12.400                   | -15.908     | -8.892      | 0.000   |                                |        |      |       |       |  |  |
| Random | Nivolumab          |                  |         |             |                  |             |               | -6.784                    | -19.233     | 5.665       | 0.286   |                                |        |      |       |       |  |  |
| Random | Pembrolizumab      | Schadendorf 2016 | Pain    | 176         | 167              | Melanoma    | Pembrolizumab | -2.600                    | -4.456      | -0.744      | 0.006   |                                |        |      |       |       |  |  |
|        | Pembrolizumab      | Barlesi 2019     | Pain    | 331         | 293              | NSCLC       | Pembrolizumab | 0.070                     | -1.502      | 1.642       | 0.930   |                                |        |      |       |       |  |  |
|        | Pembrolizumab      | Vaughn 2018      | Pain    | 266         | 253              | Urothelial  | Pembrolizumab | -7.720                    | -9.525      | -5.915      | 0.000   |                                |        |      |       |       |  |  |
|        | Pembrolizumab      | Brahmer 2017     | Pain    | 150         | 147              | NSCLC       | Pembrolizumab | -7.800                    | -9.577      | -6.023      | 0.000   |                                |        |      |       |       |  |  |
| Random | Pembrolizumab      |                  |         |             |                  |             |               | -4.501                    | -8.459      | -0.543      | 0.026   |                                |        |      |       |       |  |  |
| Random | Overall            |                  |         |             |                  |             |               | -0.332                    | -0.969      | 0.305       | 0.306   |                                |        |      |       |       |  |  |

## References

1. Ascierto PA, Del Vecchio M, Robert C, *et al.* Ipilimumab 10 mg/kg versus ipilimumab 3 mg/kg in patients with unresectable or metastatic melanoma: a randomised, double-blind, multicentre, phase 3 trial. *Lancet Oncol* 2017;18(5):611-622.
2. Barlesi F, Garon EB, Kim DW, *et al.* Health-Related Quality of Life in KEYNOTE-010: a Phase II/III Study of Pembrolizumab Versus Docetaxel in Patients With Previously Treated Advanced, Programmed Death Ligand 1-Expressing NSCLC. *J Thorac Oncol* 2019;14(5):793-801.
3. Bordoni R, Ciardiello F, Von Pawel J, *et al.* Patient-Reported Outcomes (PROs) in OAK: A Phase III Study of Atezolizumab vs Docetaxel in Non-Small-Cell Lung Cancer (NSCLC). *Journal of Thoracic Oncology* 2017;12(11):S1913-S1914.
4. Brahmer JR, Rodriguez-Abreu D, Robinson AG, *et al.* Health-related quality-of-life results for pembrolizumab versus chemotherapy in advanced, PD-L1-positive NSCLC (KEYNOTE-024): a multicentre, international, randomised, open-label phase 3 trial. *Lancet Oncol* 2017;18(12):1600-1609.
5. Cella D, Grunwald V, Nathan P, *et al.* Quality of life in patients with advanced renal cell carcinoma given nivolumab versus everolimus in CheckMate 025: a randomised, open-label, phase 3 trial. *Lancet Oncol* 2016;17(7):994-1003.
6. Coens C, Suciuc S, Chiarion-Sileni V, *et al.* Health-related quality of life with adjuvant ipilimumab versus placebo after complete resection of high-risk stage III melanoma (EORTC 18071): secondary outcomes of a multinational, randomised, double-blind, phase 3 trial. *Lancet Oncol* 2017;18(3):393-403.
7. El-Khoueiry AB, Sangro B, Yau T, *et al.* Nivolumab in patients with advanced hepatocellular carcinoma (CheckMate 040): an open-label, non-comparative, phase 1/2 dose escalation and expansion trial. *Lancet* 2017;389(10088):2492-2502.
8. Harrington KJ, Ferris RL, Blumenschein G, Jr., *et al.* Nivolumab versus standard, single-agent therapy of investigator's choice in recurrent or metastatic squamous cell carcinoma of the head and neck (CheckMate 141): health-related quality-of-life results from a randomised, phase 3 trial. *Lancet Oncol* 2017;18(8):1104-1115.
9. Hui R, Ozguroglu M, Villegas A, *et al.* Patient-reported outcomes with durvalumab after chemoradiotherapy in stage III, unresectable non-small-cell lung cancer (PACIFIC): a randomised, controlled, phase 3 study. *Lancet Oncol* 2019;20(12):1670-1680.
10. Kaufman HL, Hunger M, Hennessy M, *et al.* Nonprogression with avelumab treatment associated with gains in quality of life in metastatic Merkel cell carcinoma. *Future Oncol* 2018;14(3):255-266.
11. Larkin J, Minor D, D'Angelo S, *et al.* Overall Survival in Patients With Advanced Melanoma Who Received Nivolumab Versus Investigator's Choice Chemotherapy in CheckMate 037: A Randomized, Controlled, Open-Label Phase III Trial. *Journal of Clinical Oncology* 2018;36(4):383-+.
12. Long GV, Atkinson V, Ascierto PA, *et al.* Effect of nivolumab on health-related quality of life in patients with treatment-naive advanced melanoma: results from the phase III CheckMate 066 study. *Ann Oncol* 2016;27(10):1940-6.
13. Mathias SD, Kotapati S, Le TK, *et al.* Health-related quality of life (HRQoL) and patient experience in advanced melanoma: 6-month results from the image study. *Quality of Life Research* 2015;24:17-18.
14. Mazieres J, Kowalski D, Luft A, *et al.* Health-related quality of life (HRQoL) for pembrolizumab or placebo plus carboplatin and paclitaxel or nab-paclitaxel in patients with metastatic squamous NSCLC: Data from KEYNOTE-407. *Annals of Oncology* 2018;29.
15. O'Donnell PH, Arkenau HT, Sridhar SS, *et al.* Patient-reported outcomes (PROs) in patients with urothelial carcinoma (UC) treated with durvalumab (second-line or above) in phase 1/2 dose-escalation study 1108. *Journal of Clinical Oncology* 2018;36(15).

16. Perol M, Dixmier A, Barlesi F, *et al.* Health-related quality of life (HRQoL) of non-small cell lung cancer (NSCLC) patients treated with nivolumab in real-life: The EVIDENS study. *Ann Oncol* 2019;30 Suppl 2:ii48.
17. Petrella TM, Robert C, Richtig E, *et al.* Patient-reported outcomes in KEYNOTE-006, a randomised study of pembrolizumab versus ipilimumab in patients with advanced melanoma. *Eur J Cancer* 2017;86:115-124.
18. Powles T, Duran I, van der Heijden MS, *et al.* Atezolizumab versus chemotherapy in patients with platinum-treated locally advanced or metastatic urothelial carcinoma (IMvigor211): a multicentre, open-label, phase 3 randomised controlled trial. *Lancet* 2018;391(10122):748-757.
19. Reck M, Taylor F, Penrod JR, *et al.* Impact of Nivolumab versus Docetaxel on Health-Related Quality of Life and Symptoms in Patients with Advanced Squamous Non-Small Cell Lung Cancer: Results from the CheckMate 017 Study. *J Thorac Oncol* 2018;13(2):194-204.
20. Revicki DA, van den Eertwegh AJ, Lorigan P, *et al.* Health related quality of life outcomes for unresectable stage III or IV melanoma patients receiving ipilimumab treatment. *Health Qual Life Outcomes* 2012;10:66.
21. Schadendorf D, Dummer R, Hauschild A, *et al.* Health-related quality of life in the randomised KEYNOTE-002 study of pembrolizumab versus chemotherapy in patients with ipilimumab-refractory melanoma. *Eur J Cancer* 2016;67:46-54.
22. Schadendorf D, Larkin J, Wolchok J, *et al.* Health-related quality of life results from the phase III CheckMate 067 study. *Eur J Cancer* 2017;82:80-91.
23. Sharma P, Retz M, Siefker-Radtke A, *et al.* Nivolumab in metastatic urothelial carcinoma after platinum therapy (CheckMate 275): a multicentre, single-arm, phase 2 trial. *Lancet Oncol* 2017;18(3):312-322.
24. Vaughn DJ, Bellmunt J, Fradet Y, *et al.* Health-Related Quality-of-Life Analysis From KEYNOTE-045: A Phase III Study of Pembrolizumab Versus Chemotherapy for Previously Treated Advanced Urothelial Cancer. *J Clin Oncol* 2018;36(16):1579-1587.
25. Weber J, Mandala M, Del Vecchio M, *et al.* Adjuvant Nivolumab versus Ipilimumab in Resected Stage III or IV Melanoma. *N Engl J Med* 2017;377(19):1824-1835.
26. Younes A, Santoro A, Shipp M, *et al.* Nivolumab for classical Hodgkin's lymphoma after failure of both autologous stem-cell transplantation and brentuximab vedotin: a multicentre, multicohort, single-arm phase 2 trial. *Lancet Oncology* 2016;17(9):1283-1294.
